# 1 A computational method for 2 predicting the most likely 3 evolutionary trajectories in the 4 step-wise accumulation of resistance 5 mutations

6 R. Charlotte Eccleston<sup>1\*</sup>, Emilia Manko<sup>1</sup>, Susana Campino<sup>1</sup>, Taane G. Clark<sup>1,2</sup>,  
7 Nicholas Furnham<sup>1</sup>

\*For correspondence:

[charlotte.eccleston@lshtm.ac.uk](mailto:charlotte.eccleston@lshtm.ac.uk)  
(RCE)

8 <sup>1</sup>Department of Infection Biology, London School of Hygiene and Tropical Medicine,  
9 London, United Kingdom; <sup>2</sup>Department of Infectious Disease Epidemiology, London  
10 School of Hygiene and Tropical Medicine, London, United Kingdom

---

11  
12 **Abstract** Pathogen evolution of drug resistance often occurs in a stepwise manner via the  
13 accumulation of multiple mutations that in combination have a non-additive impact on fitness, a  
14 phenomenon known as epistasis. The evolution of resistance via the accumulation of point  
15 mutations in the DHFR genes of *Plasmodium falciparum* (Pf) and *Plasmodium vivax* (Pv) has been  
16 studied extensively and multiple studies have shown epistatic interactions between these  
17 mutations determine the accessible evolutionary trajectories to highly resistant multiple  
18 mutations. Here, we simulated these evolutionary trajectories using a model of molecular  
19 evolution, parameterized using Rosetta Flex ddG predictions, where selection acts to reduce the  
20 target-drug binding affinity. We observe strong agreement with pathways determined using  
21 experimentally measured IC50 values of pyrimethamine binding, which suggests binding affinity  
22 is strongly predictive of resistance and epistasis in binding affinity strongly influences the order of  
23 fixation of resistance mutations. We also infer pathways directly from the frequency of mutations  
24 found in isolate data, and observe remarkable agreement with the most likely pathways  
25 predicted by our mechanistic model, as well as those determined experimentally. This suggests  
26 mutation frequency data can be used to intuitively infer evolutionary pathways, provided  
27 sufficient sampling of the population.

---

## 29 Introduction

30 The development of new antimicrobial therapeutics and the design of successful drug deployment  
31 strategies to reduce the prevalence of resistance, requires an understanding of the underlying  
32 molecular evolution. Antimicrobial resistance (AMR) poses a huge global health threat through a  
33 wide range of mechanisms (Sun et al., 2019; Davies and Davies, 2010; Levy and Marshall, 2004;  
34 Rodrigues et al., 2016). One of the major routes to resistance, and focus of this work, is genomic  
35 variation within protein coding regions. Of particular significance are single-nucleotide polymor-  
36 phisms (SNPs) in the antimicrobial target gene that alter the protein structure and prevent efficient  
37 binding of the antimicrobial drug. Provided these SNPs do not prevent the target from carrying out

38 its function, the resistant strains will proliferate within the population (*Blair et al., 2015*).

39 The evolution of resistance is affected by the interplay between selection for resistance, selection  
40 for protein function, drug concentration and mutational bias, and it is also influenced by a  
41 phenomenon known as epistasis (*Weinreich et al., 2006; Lozovsky et al., 2009; Jiang et al., 2013*).

42 Epistasis between mutations within the same protein arises due to energetic interactions between  
43 the amino acids, where the impact of a mutation depends upon the protein sequence (*Starr  
44 and Thornton, 2016*). When epistasis occurs between two or more mutations, their combined impact  
45 on protein fitness or a physical trait such as stability or binding affinity, does not equal the  
46 sum of their independent impacts. Epistasis determines the order of fixation of mutations and the  
47 accessibility of evolutionary trajectories to resistance phenotypes (*Weinreich et al., 2006, 2005*) and  
48 has been observed in the evolution of many pathogens (*Khan et al., 2011; Gong et al., 2013; San-  
49 juán et al., 2005*), including the evolution of resistance in *Plasmodium falciparum* (*Lozovsky et al.,  
50 2009; Sirawaraporn et al., 1997*) and *Plasmodium vivax* (*Jiang et al., 2013*). It may also have impor-  
51 tant consequences for the success of AMR management strategies that aim to reduce resistance  
52 via the cessation of use of a particular drug, which theoretically should result in reversion of resis-  
53 tance mutations, due to the fitness cost incurred in the absence of the drug (*Melnyk et al., 2015;  
54 Vogwill and MacLean, 2015*). However, the success of this strategy has been mixed, and in some  
55 cases bacterial populations remained resistant (*Costelloe et al., 2010; Enne, 2010; Sundqvist et al.,  
56 2010*), likely due to compensatory mutations (a type of epistasis), which mitigate the deleterious  
57 impact of resistance mutations, allowing them to remain in a population and thus retain resistance  
58 even in the absence of drug selection pressures (*Andersson and Hughes, 2011*).

59 Fragment-based drug discovery (FBDD) and AMR surveillance strategies require methods to  
60 predict evolutionary trajectories to resistance. For example, by identifying mutations involved in  
61 resistance trajectories that reduce the effectiveness of an antimicrobial drug, specific regions of  
62 a target molecule can be exploited or avoided, thus creating 'evolution proof' drugs. Therefore,  
63 understanding how epistasis arises and predicting which mutations will interact, is important for  
64 anticipating future mutations, designing new drugs and developing strategies to minimize resis-  
65 tance.

66 Evolution towards drug-resistant phenotypes in malaria species *P. falciparum* and *P. vivax* has  
67 been shown to occur in a stepwise manner, due to epistatic interactions between mutations, and  
68 the most likely trajectories to resistance phenotypes have been predicted using experimental mea-  
69 sures of resistance (*Lozovsky et al., 2009; Jiang et al., 2013; Sirawaraporn et al., 1997*).

70 *P. falciparum* and *P. vivax* parasites cause the majority of malaria infections and have evolved  
71 strong resistance to many antimalarial drugs, including pyrimethamine (*Sirawaraporn et al., 1997*)  
72 and sulfadoxine (*Wang et al., 1997*). There were an estimated 241 million new cases of malaria  
73 world-wide in 2020, resulting in approximately 627,000 deaths predominately among children under  
74 5 years of age (*WHO, 2021*). *P. falciparum* malaria has been treated with the combination drug  
75 sulfadoxine-pyrimethamine (SP) since 1970s, which targets the folate metabolic pathway. Numer-  
76 ous resistance mutations have arisen within its genome as a result of SNPs in *P. falciparum* dihy-  
77 drofolate reductase (*PfDHFR*) and dihydropteroate synthase (*PfDHPS*) genes, which are the targets  
78 of pyrimethamine and sulfadoxine respectively (*Wang et al., 1997; Brooks et al., 1994*). Although  
79 SP is not usually used to treat *P. vivax*, co-infections with *P. falciparum* have meant SP resistance  
80 mutations have also arisen in the *P. vivax* genome (*Snounou and White, 2004*). The enzymes of the  
81 folate pathway are largely conserved across *Plasmodium* species, and so polymorphisms in equiva-  
82 lent positions have been observed in *P. vivax* DHFR (*PvDHFR*) and DHPS (*PvDHPS*) and are thought  
83 to confer resistance to SP (*Korsinczyk et al., 2004; Hastings et al., 2004*).

84 The DHFR gene encodes an enzyme that uses NADPH to synthesize tetrahydrofolate, a co-factor  
85 in the synthesis of amino acids (*Kompis et al., 2005*) and pyrimethamine acts to disrupt this pro-  
86 cess, thereby blocking DNA synthesis and slowing down growth. Stepwise acquisition of multiple  
87 mutations leading to resistance to pyrimethamine has been observed in both *PfDHFR* (*Lozovsky  
88 et al., 2009; Sirawaraporn et al., 1997*) and *PvDHFR* (*Jiang et al., 2013*).

89 Resistance in *Pf*DHFR has been studied extensively and a combination of four mutations –  
90 Asn-51 to Ile (N51I), Cys-59 to Arg (C59R), Ser-108 to Asn (S108N) and Ile-164 to Leu (I164L) –  
91 has been reported to result in resistance to pyrimethamine (*Ferlan et al., 2001*) by altering the  
92 binding pocket and reducing the affinity for the drug (*Yuthavong et al., 2005*). Epistasis in both  
93 pyrimethamine binding free energy and the concentration required to inhibit cell growth by 50%  
94 (IC50) has been observed experimentally for combinations of these four mutations (*Lozovsky et al.,*  
95 *2009; Sirawaraporn et al., 1997*). This means that mutations which on their own are not associated  
96 with a resistance phenotype, can be when in combination with other mutations. Epistasis between  
97 these mutations has been shown to determine the evolutionary trajectories to the quadruple muta-  
98 tion N51I,C59R,S108N,I164L, which is strongly associated with pyrimethamine resistance (*Lozovsky*  
99 *et al., 2009*).

100 A similar investigation was conducted into the homologous set of *Pv*DHFR mutations – Asn-50  
101 to Ile (N50I), Ser-59 to Arg (S58R), Ser-117 to Asn (S117N) and Ile-173 to Leu (I173L) - and the acces-  
102 sible evolutionary trajectories to the quadruple mutation (*Jiang et al., 2013*), some combinations  
103 of which have been observed to result in pyrimethamine resistance both in vivo and in vitro (*Hast-*  
104 *ings et al., 2004; Hawkins et al., 2007*). Evolutionary simulations accounting for growth rates, IC50  
105 measurements for increasing concentrations of pyrimethamine and nucleotide bias predicted the  
106 most likely pathways to the quadruple mutation for different drug concentrations. The observed  
107 trajectories at each concentration were influenced by epistasis between the mutations and the  
108 adaptive conflict between endogenous function and acquisition of drug resistance. These studies,  
109 along with other investigations (*Weinreich et al., 2006; Tamer et al., 2019*), have highlighted the  
110 prevalence of epistasis among resistance mutations and the importance of considering epistatic  
111 interactions between mutations when predicting evolutionary trajectories to drug resistance.

112 The predictability of evolution is a central topic in biology of interest to experimentalists and  
113 theorists alike (*Achaz et al., 2014; Lobkovsky and Koonin, 2012; Szendro Ivan et al., 2013*) (for a  
114 review of the topic see *de Visser and Krug (2014)*). By using experimentally measured values to  
115 characterize the empirical fitness landscapes and simulate evolutionary trajectories, the work in  
116 *Lozovsky et al. (2009)* and *Jiang et al. (2013)* is determining the predictability of evolution in these  
117 landscapes by assessing which trajectories are accessible and the level of determinism associated  
118 with the evolution. Whilst such experimental methods have been successful in capturing epistasis,  
119 characterizing evolutionary landscapes and predicting evolutionary trajectories, they are expensive  
120 and time consuming.

121 The development of computational methods to predict resistance trajectories would enable  
122 fast and efficient predictions and would be more widely accessible than lab-based methods. Com-  
123 putational tools could help narrow down the pool of mutations to be studied experimentally and  
124 would also be applicable to difficult to study targets. Some target-specific computational tools to  
125 predict individual resistance mutations have been developed (*Karmakar et al., 2020; Portelli et al.,*  
126 *2020*). However, such tools are target specific and so not generalizable. Furthermore, they only  
127 consider independent mutations on a single structure and so ignore epistasis between resistance  
128 mutations. Therefore, they are not suitable for predicting evolutionary trajectories to resistance.

129 To determine a generalizable computational method to predict evolutionary trajectories to re-  
130 sistance, we need to consider the main determinants of resistance. *Rodrigues et al. (2016)* inves-  
131 tigated three mutations in *Escherichia coli* DHFR associated with trimethoprim resistance and con-  
132 sidered activity, binding affinity, fold stability, and intracellular abundance. They found that whilst  
133 resistance is a trade-off between these factors, binding affinity is the single most predictive trait  
134 of resistance, especially at later points in evolution. Therefore, we decided to investigate if predic-  
135 tions of binding affinity change can be used to predict the order of fixation of resistance mutations  
136 involved in evolutionary trajectories to resistance.

137 Rosetta Flex ddG (*Barlow et al., 2018*) is the current state-of-the art method for predicting  
138 changes in protein-protein and protein-ligand binding free energy. Rosetta is a software suite for  
139 macromolecular modelling and design that uses all-atom mixed physics- and knowledge-based

140 potentials, and provides a diverse set of protocols to perform specific tasks, such as structure pre-  
141 diction, molecular docking and homology modelling (Alford *et al.*, 2017). The Flex ddG protocol  
142 has been found to perform better than machine learning methods and comparably to molecular  
143 dynamics methods when tested on a large dataset of ligand binding free energy changes upon pro-  
144 tein mutation (Aldeghi *et al.*, 2018, 2019). However, its ability to capture epistasis has not yet been  
145 tested. Therefore, we investigated how well Flex ddG can capture epistasis between resistance  
146 mutations in *PfDHFR* and observed a good agreement with experimental data.

147 Next, we used the Flex ddG predictions to parameterize a fitness function applied in an ex-  
148 isting model of molecular evolution. We used this method to predict evolutionary trajectories to  
149 known resistant quadruple mutants in both *PfDHFR* and *PvDHFR*, where the evolutionary trajec-  
150 tories have been studied experimentally (Lozovsky *et al.*, 2009; Jiang *et al.*, 2013). Good agreement  
151 was observed between the most likely trajectories to the quadruple mutations predicted by our  
152 model and those predicted experimentally. This suggests binding affinity is highly predictive of  
153 resistance, supporting the conclusions of Rodriguez *et al.* (2016).

154 The main advantage of this approach is that it does not require access to an experimental 'wet'  
155 lab and can be carried out by anyone with access to a high-performance computer. It is general-  
156 izable to any antimicrobial drug that acts by binding to its target and can be easily applied to any  
157 drug-target complex for which there is an available structure. Therefore, it can be used to study  
158 complexes and systems that might be problematic experimentally. It enables accurate assessment  
159 of the predictability of the evolutionary landscape and can predict whether we would expect to see  
160 constrained evolutionary trajectories on a fitness landscape as a result of epistatic interactions in  
161 drug binding free energy.

162 In addition, we analyzed if evolutionary pathways can be inferred from the frequency of mu-  
163 tations found in isolate data. We determined the frequency of mutations in *PfDHFR* and *PvDHFR*,  
164 and inferred the most likely evolutionary pathways under the assumption that the most likely mu-  
165 tation at each step corresponds to the most frequent mutation. We carried out this analysis first  
166 upon a combined set of global isolates and then upon isolates from individual regions. The most  
167 likely pathways inferred from the global isolate data agreed remarkably well with both the exper-  
168 imentally determined pathways and the pathways predicted by our computational method. This  
169 suggests evolutionary trajectories can be inferred from the frequency of mutations observed in  
170 isolate data, provided adequate sampling of the population. When considering geographical re-  
171 gions separately, the inferred pathways from several regions agreed well with the experimental  
172 pathways and our predicted pathways, however the most likely pathways inferred in some regions  
173 differed from the main pathways, highlighting the importance of considering the evolution in dif-  
174 ferent regions separately.

## 175 Results

### 176 Rosetta Flex ddG captures general trends in binding free energy changes and epis- 177 tasis

178 We investigated if Flex ddG predictions agree with experimentally measured binding free energy  
179 and if these predictions can be used to calculate the non-additivity in binding free energy (interac-  
180 tion energy), which for a double mutant defines the epistasis between the two mutations and, for  
181 a triple mutant or higher, captures the level of epistatic interactions. We calculated the interaction  
182 energy by finding the difference between the predicted change in binding free energy of a mul-  
183 tiple mutation and the sum of the predictions of their independent binding free energy changes.  
184 A positive value of the interaction energy indicates the sum of the independent impacts is more  
185 destabilizing than the impact of the multiple mutation and a negative value indicates the sum is  
186 less destabilizing than the combined impact.

187 The change in binding free energy was predicted using Flex ddG for the combinatorically com-  
188 plete set of the four *PfDHFR* pyrimethamine resistance mutations N51I, C59R, S108N and I164L.

189 (Note on notation: lists of single mutations are written  $X, Y, Z$ , multiple mutations are written  $X,Y,Z$   
190 (i.e. no space between the commas and the mutations) and pathways are written  $X/Y/Z$  to denote  
191 the order of fixation).

192 We compared the predictions to the data from *Sirawaraporn et al. (1997)* in which they deter-  
193 mined binding free energy changes for a subset of the possible combinations of mutations, the  
194 sum of the independent mutations (calculated for multiple mutants to compare to the experimen-  
195 tally determined binding free energy changes of multiple mutants) and the interaction energy of  
196 the multiple mutants (Table 1). A positive  $\Delta\Delta G$  value indicates a destabilising mutation and a neg-  
197 ative  $\Delta\Delta G$  value indicates a stabilising mutation (Note: Rosetta Flex ddG calculates the change in  
198 binding free energy as  $\Delta\Delta G = \Delta G_{mut} - \Delta G_{WT}$ , whereas *Sirawaraporn et al. (1997)* calculated the  
199 change as the reverse,  $\Delta\Delta G = \Delta G_{WT} - \Delta G_{mut}$ , where *WT* indicates the wild-type free energy and  
200 *mut* indicates the mutant free energy. Therefore, in *Sirawaraporn et al. (1997)*, a mutation that  
201 destabilized the binding corresponded to a negative  $\Delta\Delta G$ , whilst here we have reversed the signs  
202 of their data to enable comparison with our predictions).

203 The authors of the Flex ddG protocol suggest conducting a minimum of 35 runs and taking the  
204 average of the distribution as the prediction for that mutation (*Barlow et al., 2018*). We found the  
205 average of the distributions converges and the rank order of the mutations is constant at around  
206 250 runs (Appendix 1-Figure 3 and Appendix 1-Figure 4). We compared the predictions for 250  
207 runs and the data from *Sirawaraporn et al. (1997)*(1) and observed a correlation of 0.611 for the  
208 binding free energy data, 0.660 for the sum of the independent predictions for multiple mutants  
209 and 0.756 for the interaction energy. We found 8/9 binding free energy predictions were correctly  
210 classified, 4/ 5 of the sum of the independent predictions were correctly classified and 4/ 5 of the  
211 interaction energies were correctly classified. Comparing the predictions for 35 runs (Appendix 1-  
212 Figure 1, Appendix 1- Table 1) and 250 (Appendix 1-Figure 2, Table 1) runs, 250 runs provides the  
213 best trade-off between accuracy and efficiency (see Supplementary text for detailed discussion).  
214 Therefore, we will be discussing the predictions for  $n=250$  going forward.

215 Mutation S108N was the only single mutation to destabilize pyrimethamine binding in both the  
216 experimental data and the Flex ddG predictions. However, in the experimental data the double  
217 mutation N51I,S108N is more destabilizing to binding than single mutation S108N, but the Flex  
218 ddG prediction was stabilizing. The triple mutation C59R,S108N,I164L was found experimentally  
219 to be the most destabilizing of the triple mutations, however Flex ddG predicted it to be only mildly  
220 destabilizing and the least destabilizing of the triple mutations. Furthermore, the quadruple mu-  
221 tation was found experimentally to have the most destabilizing impact out of all combinations of  
222 single and multiple mutations, however, Flex ddG predicted it to be less destabilizing than the  
223 double mutation C59R,S108N and single mutation S108N.

224 Considering the interaction energy, the incorrectly classified mutation was again N51I,S108N  
225 which was predicted to be positive, but found experimentally to be negative, because the sum of  
226 the individual predictions was destabilizing but the double mutation itself was predicted to be sta-  
227 bilizing. Both the experimental data and our predictions found that the quadruple mutation had  
228 the largest magnitude interaction energy reflecting the greatest difference between the stabiliz-  
229 ing impact of the sum of the individual mutations and the destabilizing impact of the quadruple  
230 mutation itself.

231 We also observed large negative interaction energy between S108N and C59R, where C59R is  
232 stabilizing in the wildtype background but destabilizing in the background of S108N, an example  
233 of sign epistasis and in agreement with the observations of both *Sirawaraporn et al. (1997)* and *Lo-  
234 zovsky et al. (2009)* However, whilst the interaction energy of the triple mutation N51I,C59R,S108N  
235 was positive for both the experimental data and predictions, in our predictions its magnitude was  
236 much smaller compared to the data. Both single mutations N51I and C59R were predicted to be  
237 only marginally stabilizing – almost neutral - to pyrimethamine binding, whilst in the experimental  
238 data both mutations have a large stabilizing impact. Furthermore, the triple mutation was pre-  
239 dicted to be only marginally more destabilizing than single mutation S108N, resulting in the small



**Table 1.** Correlation between Flex ddG predictions for 250 runs and experimental data (see table 4 of *Sirawaraporn et al. (1997)*) for *PfDHFR* pyrimethamine resistance mutations

| Mutation              | $\Delta\Delta G_{exp}^*$<br>(kcal/mol) | Exp. Sum** | Exp I.E.*** | $\Delta\Delta G_{FlexddG}^\dagger$<br>(kcal/mol) | Sum‡   | I.E.§  |
|-----------------------|----------------------------------------|------------|-------------|--------------------------------------------------|--------|--------|
| N51I                  | -0.783                                 |            |             | -0.124                                           |        |        |
| C59R                  | -0.184                                 |            |             | -0.033                                           |        |        |
| S108N                 | 1.297                                  |            |             | 0.312                                            |        |        |
| I164L                 | -0.351                                 |            |             | -0.323                                           |        |        |
| N51I,S108N            | 1.89                                   | 0.514      | 1.376       | -0.166                                           | 0.188  | -0.354 |
| C59R,S108N            | 2.29                                   | 1.113      | 1.177       | 0.399                                            | 0.279  | 0.119  |
| N51I,C59R,S108N       | 2.595                                  | 0.33       | 2.265       | 0.162                                            | 0.155  | 0.007  |
| C59R,S108N,I164L      | 3.283                                  | 0.762      | 2.521       | 0.018                                            | -0.043 | 0.061  |
| N51I,C59R,S108N,I164L | 3.761                                  | -0.021     | 3.782       | 0.301                                            | -0.168 | 0.469  |
| Pearson Correlation   |                                        |            |             | 0.611                                            | 0.660  | 0.756  |
| Correctly Classified  |                                        |            |             | 8/9                                              | 4/5    | 4/5    |

\*Experimentally measured *PfDHFR* pyrimethamine binding free energy change data from *Sirawaraporn et al. (1997)*

\*\*Sum of experimental values of binding free energy change for independent mutations

\*\*\*Interaction energy calculated as the difference between experimentally measured values of binding free energy change of multiple mutant compared to the sum of the independent mutations involved

†Change in *PfDHFR*-pyrimethamine binding free energy predicted by Flex ddG calculated as the average of the distribution of runs. Free energy predictions from Rosetta are in Rosetta Energy Units, however the authors of Flex ddG applied a generalized additive model to re-weight the predictions and make the output more comparable to units of kcal/mol (*Barlow et al., 2018*)

‡Sum of Flex ddG predictions for independent mutations

§Interaction energy calculated as the difference between Flex ddG predicted binding free energy change of multiple mutant compared to the sum of the independent mutations.

240 negative interaction energy.

241 We conclude that although there are some disagreements between the predictions and the  
 242 data, Flex ddG is able to capture the general trend of the data. However, if we use the average  
 243 of the distributions as a summary metric of the predictions for the combinatorically complete set  
 244 of the four mutations and try to infer a pathway through to the quadruple mutation, under the  
 245 criteria that each subsequent mutation must destabilize pyrimethamine binding more than the  
 246 last, then we are unable to find a pathway through. However, since the predictions capture the  
 247 general trend observed in the data, and the summary metric does not fully characterize the entire  
 248 distribution of predictions, we used the distributions to parameterize an evolutionary model to  
 249 determine if we can predict a pathway through to the quadruple mutation and if the predicted  
 250 evolutionary trajectories agree with experimentally determined evolutionary trajectories.

### 251 **A thermodynamic evolutionary model predicts the most likely evolutionary trajec-** 252 **tories to quadruple mutations in both *PfDHFR* and *PvDHFR***

253 We simulated the evolutionary trajectories to the quadruple mutants described above for the  
 254 genes *PfDHFR* and *PvDHFR* using an evolutionary model, adapted from previous studies (*Eccle-*  
 255 *ston et al., 2021; Pollock et al., 2012, 2017*). In this model, selection acts to reduce the binding  
 256 affinity between target protein and the antimalarial drug with which the mutations have been as-  
 257 sociated with resistance. Briefly, starting from the wild-type protein, we randomly sample a value  
 258 from the Flex ddG distributions for each of the four single mutations and calculate the fitness of the

259 mutated protein (Eq. 1), and the fixation probability (Eq. 2. A mutation is then chosen with a prob-  
260 ability proportional to the fixation probability and this is repeated until the quadruple mutation is  
261 reached. If the set of sampled mutations at a step all have a fixation probability of zero, the algo-  
262 rithm terminates at that point in the pathway and begins the next run at the single mutation step.  
263 Therefore, it is not guaranteed that a run will reach the quadruple mutation. We carried out 50,000  
264 runs and determined i) the number of runs that reached a single, double, triple or the quadruple  
265 mutation before the run ended (files ending ' \_endpoint\_numbers.csv'), ii) the frequency of the  
266 observed trajectories up to the quadruple mutation, including trajectories that terminated before  
267 the quadruple mutation (files ending ' \_pathway\_endpoints.csv'), iii) the frequency at which a mu-  
268 tational step was chosen in all runs (files ending ' \_total\_pathway\_probabilities.csv') and iv)  
269 the most likely trajectories to the quadruple mutation predicted by our simulations (files ending  
270 ' \_quadruple\_pathways.csv').

271 To determine how well our simulations reflect the evolutionary process to the *PfDHFR* quadru-  
272 ple mutation N51I,C59R,S108N,I164L, we compared our results to experimentally determined evo-  
273 lutionary trajectories as presented by *Lozovsky et al. (2009)*. In our simulations, the quadruple mu-  
274 tation was reached in approximately 8% of runs (see Supplementary file 'PfDHFR\_endpoint\_numbers.csv').  
275 The majority of the runs (66%) terminated at a double mutation, with S108N/C59R the most likely  
276 trajectory over all. The algorithm was often unable to proceed passed S108N/C59R because the  
277 Flex ddG distribution for C59R,S108N is concentrated around large destabilizing values (Appendix  
278 1 -Figure 2f) whilst the distributions of the two possible next steps, N51I,C59R,S108N and  
279 C59R,S108N,I164L, are concentrated around lower destabilizing values ( Appendix 1- Figures 2g  
280 and h). Therefore, in many instances, the change in binding free energy caused by the next step  
281 in the pathway were predicted to be stabilizing, and thus were not be chosen by the algorithm.  
282 This demonstrates the dependence of the method upon the accuracy of the Flex ddG. In contrast,  
283 the majority of runs in the simulations based on IC50 measurements presented in *Lozovsky et al.*  
284 *(2009)* reached the quadruple mutation (see Figure 2 in *Lozovsky et al. (2009)*).

285 However, since we are interested in how epistasis influences the order of fixation of mutations  
286 in an evolutionary trajectory to a high-resistance quadruple mutation, we compared the most likely  
287 trajectories to the quadruple mutation predicted by our simulations to the most likely trajectories  
288 to the quadruple mutation predicted in *Lozovsky et al. (2009)* and observed remarkable agree-  
289 ment. The top two most likely trajectories predicted by our model to the *PfDHFR* quadruple muta-  
290 tion were S108N/C59R/N51I/I164L and S108N/C59R/I164L/N51I, respectively (Figure ??) which cor-  
291 respond to the top two most likely pathways to the quadruple mutation determined in *Lozovsky*  
292 *et al. (2009)*. The third most likely trajectory to the quadruple mutation in *Lozovsky et al. (2009)*  
293 was predicted to be S108N/N51I/C59R/I164L, however this pathway was predicted to be unlikely in  
294 our simulations, due to the fact that the distribution of Flex ddG predictions for double mutation  
295 N51I,S108N was mostly stabilizing to pyrimethamine binding (Appendix 1- Figure 2e), whereas all  
296 of the S108N distribution was destabilizing to pyrimethamine binding, so this step was unlikely to  
297 be chosen by the evolutionary algorithm.

298 Considering the frequency at which the single mutations were chosen as the first step in all sim-  
299 ulated pathways ('PfDHFR\_total\_pathway\_probabilities.csv'), S108N was the most likely single  
300 mutation and C59R was the second most likely single mutation, in agreement with the two most  
301 likely first steps in the pathways predicted in *Lozovsky et al. (2009)*. The most likely pathway to a  
302 double mutation realized in all trajectories in both our simulations and the simulations in *Lozovsky*  
303 *et al. (2009)* is S108N/C59R. Similarly, the most likely pathway to a triple mutation realized in all  
304 our simulations and in *Lozovsky et al. (2009)* was S108N/C59R/N51I.

305 To simulate the evolutionary pathways for *PvDHFR*, we also carried out predictions of binding  
306 free energy changes for the homologous set of four mutations in *PvDHFR*, (N50I, S58R, S117N and  
307 I173L). Unfortunately, binding affinity data is not available for the mutations in *PvDHFR* to com-  
308 pare to the Flex ddG predictions. However, *Jiang et al. (2013)* predicted pathways to the *PvDHFR*  
309 quadruple mutation for four pyrimethamine concentrations using simulations informed by both

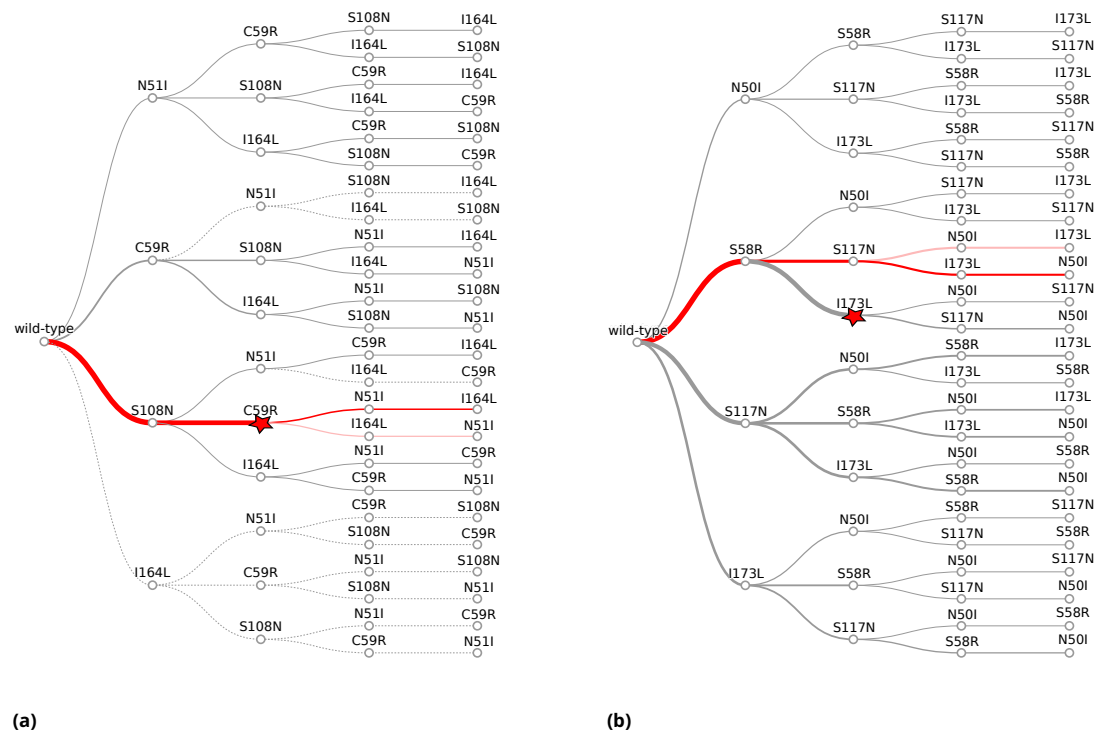

**Figure 1.** The probability of simulated evolutionary pathways to quadruple mutations **(a)** N51I,C59R,S108N,I164L in *PfDHFR* and **(b)** N50I,S58R,S117N,I173L in *PvDHFR*. Line thickness indicates the total probability of a mutation when considering all pathways it can occur in, determined from the frequency of that step in all realized mutational pathways from all runs. Dotted lines indicate zero probability of a mutation at that step. The most likely pathway in total is denoted by a red star. The most likely pathway to the quadruple mutation is highlighted in dark red and the second most likely pathway to the quadruple mutation is highlighted in lighter red. The probabilities corresponding to these plots can be found in Supplementary files 'PfDHFR\_total\_pathway\_probabilities.csv' and 'PvDHFR\_total\_pathway\_probabilities.csv' for a) and b), respectively.

310 drug resistance and catalytic activity, to which we can compare our simulations. In their simula-  
 311 tions, the quadruple mutation fixed in 99.8% of runs for the highest pyrimethamine concentration,  
 312 but it did not fix for the three lower concentrations. In our simulations, the quadruple mutation  
 313 was reached in 39% of runs ('PvDHFR\_endpoint\_numbers.csv'), whilst 51% of runs terminated at  
 314 a double mutation. The most likely endpoint overall in our simulations was S58R/I173L, which  
 315 occurred in 32% of runs, however this path was not a frequent trajectory observed in the simula-  
 316 tions in *Jiang et al. (2013)*. All Flex ddG runs of double mutation S58R,I173L were predicted to be  
 317 destabilizing and many predicted to have a medium to large impact. However, the triple mutation  
 318 S58R,S117N,I173L was predicted to have a smaller destabilizing impact than S58R,S117N, mak-  
 319 ing pathway S58R/I173L/N50I unlikely, whilst N50I,S58R,I173L was predicted to be stabilizing  
 320 to pyrimethamine in all Flex ddG runs and therefore pathway S58R/I173L/N50I had a zero probability  
 321 of occurring in the simulations. This resulted in many runs terminating at step S58R/I173L. Consi-  
 322 dering the order of fixation up to the quadruple mutation, we compared the most likely evolutionary  
 323 trajectories to the quadruple mutation predicted by our simulations to the most likely evolutionary  
 324 trajectories to the quadruple mutation presented in *Jiang et al. (2013)*, and observed good agree-  
 325 ment for the largest of the four pyrimethamine concentrations they considered. The most likely  
 326 pathway to the quadruple mutation predicted by our simulations was S58R/S117N/I173L/N50I (Fig-  
 327 ure ??) which corresponds to the second most likely pathway to the quadruple mutation predicted  
 328 in *Jiang et al. (2013)* for the highest pyrimethamine concentration. Our second most likely path-  
 329 way to the quadruple mutation (S58R/S117N/N50I/I173L) corresponds to the first most likely path-



330 way predicted in *Jiang et al. (2013)* for the highest pyrimethamine concentration. There were two  
331 other possible pathways to the quadruple at the highest concentration, S117N/N50I/S58R/I173L  
332 and N50I/S117N/S58R/I173L, which correspond to the fourth and twelfth most likely pathways to  
333 the quadruple in our simulations.

334 The first step in the evolutionary trajectories determined in *Jiang et al. (2013)* for the highest con-  
335 centration was S58R whereas for the three lower concentrations it was S117N. The most likely first  
336 step in all pathways predicted by our simulations was S58R (Figure ??), whilst S117N was the sec-  
337 ond most likely first step ('PvDHFR\_total\_pathway\_probabilities.csv'). Analyzing the Flex ddG  
338 distributions, the S58R predictions are mostly destabilizing to pyrimethamine and it is the only sin-  
339 gle mutation to reduce the binding affinity when considering both the average and the peak of the  
340 distribution (Figure S1). The S117N distribution peaks around zero, meaning the majority of the  
341 runs predict this mutation has a neutral impact on pyrimethamine binding, whilst there is a smaller  
342 peak in the distribution for mildly destabilizing values (Figure S2).

343 To quantify the predictability of an evolutionary landscape, previous studies have calculated  
344 the Gibbs-Shannon entropy distribution of the path weights (*Szendro Ivan et al., 2013; de Visser  
345 and Krug, 2014*), namely  $S = -\sum P_i \ln P_i$ , where  $P_i$  is the probability of the  $i^{th}$  pathway and the value  
346 of  $S$  ranges from 0 to  $\ln n$  for  $n$  equally likely pathways. The lower the value of  $S$  the higher the  
347 predictability of the evolution i.e. most of the probability is concentrated around a small number  
348 of pathways, suggesting epistasis is influential in constraining the accessible trajectories. The value  
349 of  $S$  when considering the probability distribution of all realized evolutionary trajectories in the  
350 simulations was 1.19 for *PfDHFR* and 2.82 for *PvDHFR* (both simulations have an equal number  
351 of possible pathways because they have an equal number of mutations, so the values of  $S$  are  
352 comparable and the maximum value of  $S$  for both simulations is 4.16). This means the evolutionary  
353 trajectories were more constrained in the *PfDHFR* simulations than in the *PvDHFR* simulations and  
354 suggests that epistasis between the mutations plays a greater role in constraining the trajectories  
355 in the evolution of *PfDHFR* resistance. Unfortunately, the probabilities of all possible pathways  
356 determined in *Lozovsky et al. (2009)* and *Jiang et al. (2013)* are not made available (the data is  
357 represented in pathway diagrams, the probabilities of a step are indicated by line thickness and  
358 only the probabilities of the most likely pathways annotated), therefore we cannot calculate the  
359 corresponding values of  $S$  for these distributions for comparison.

### 360 **The frequency of mutations in isolate data can be used to infer evolutionary tra-** 361 **jectories to multiple resistance mutations**

362 It was noted in *Lozovsky et al. (2009)* that their most likely pathways to the *PfDHFR* quadruple  
363 mutation were consistent with combinations of these four mutations observed in high frequen-  
364 cies in worldwide surveys of *P. falciparum* polymorphisms. To expand on this idea, we analyzed  
365 the frequency of the combinations of mutations in *PfDHFR* and *PvDHFR* found in our isolate data  
366 to identify if there is agreement between these frequencies, the experimentally determined tra-  
367 jectories and our predicted trajectories and if, therefore, isolate frequency data may be used to  
368 infer evolutionary trajectories. We inferred evolutionary trajectories from the frequency data by  
369 assuming if a specific mutation was found in high frequency (and is part of the combinatorically  
370 complete set of four mutations found in the four genes) then it is likely to be part of the evolution-  
371 ary trajectory towards the quadruple mutation. To infer the first step in the most likely trajectory,  
372 we considered the frequency of single mutations of the set of four mutations considered for each  
373 gene and selected the most frequent mutation. To infer subsequent steps in the trajectory, we  
374 considered the frequency of only those mutations that contain the previous mutation and another  
375 of the set of four mutations in some combination and chose the most frequent mutation at each  
376 step. We also inferred alternative pathways which from the frequency data are less likely than the  
377 main pathway, but still a possibility due to the occurrence of intermediate mutations in the isolate  
378 data. To do this, we considered each step in the most likely trajectory and identified any other high  
379 frequency mutations that would enable alternative pathways from the double mutation onwards.

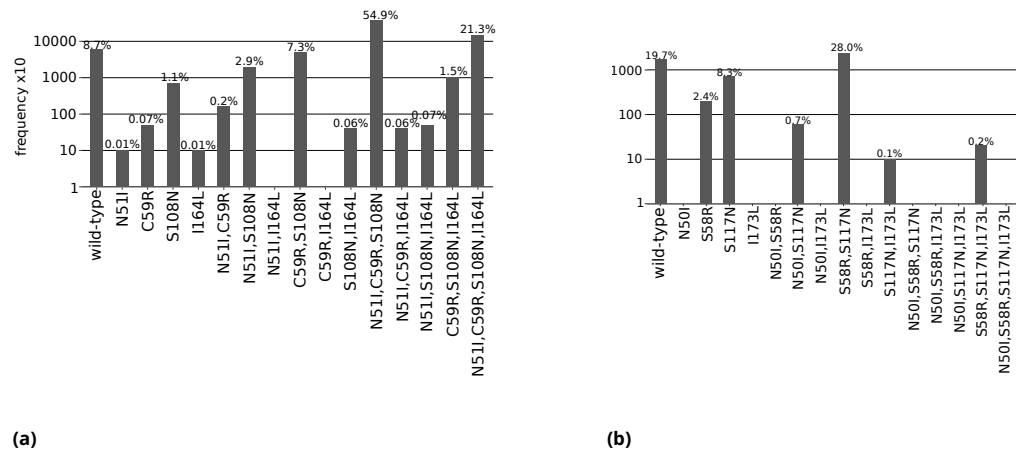

**Figure 2.** The total frequency of the combinations of mutations found in our isolate data for sets of four mutations **(a)** N51I, C59R, S108N and I164L in *PfDHFR*, and **(b)** N50I, S58R, S117N and I173L in *PvDHFR*. All frequencies have been multiplied by a factor of 10 to enable clear identification of those mutations occurring in one isolate only. The frequencies are also given as the percentage of the total number of isolates, which for *PfDHFR* is 6762 and *PvDHFR* is 847.

380 If there were no alternative pathways, we began the process again but chose the second most  
 381 frequent single mutation (if applicable) and built the pathway from there. In the event of multiple  
 382 alternative pathways, we are unable to quantify their relative likelihoods, only that they are less  
 383 likely than the most likely pathway. It is sometimes not clear which pathway is most likely. For  
 384 example, for the set of mutation frequencies  $A:9, D:10, AB:20, CD:2, ABC:50, BCD:1, ABCD:75$ , the  
 385 most likely pathway from the method stated above would be  $D/C/B/A$  and the alternative pathway  
 386 would be  $A/B/C/D$ , purely because mutation  $D$  is more abundant than mutation  $A$ . However, the  
 387 frequencies of the intermediate mutations in the most likely pathway are low compared to the al-  
 388 ternative pathway. Therefore, in these situations we will not refer to any one pathway as the most  
 389 likely pathway and will refer to all pathways as possible trajectories.

390 Considering the total frequency of each mutation in the set of four *PfDHFR* mutations (N51I,  
 391 C59R, S108N and I164L) in the isolate data (Figure ??), S108N was the most frequent single muta-  
 392 tion (72/6762 isolates), C59R,S108N the most frequent double mutation (496/6762 isolates) and  
 393 N51I,C59R,S108N the most frequent triple mutation (3714/6762 isolates). The quadruple mutation  
 394 N51I,C59R,S108N,I164L was found in 1439/6762 isolates. This suggests the pathway proceeds in  
 395 the order S108N/C59R/N51I/I164L, in agreement with the most likely pathway to the quadruple  
 396 mutation from both our evolutionary simulations and those using experimental data (**Lozovsky**  
 397 *et al.*, 2009).

398 Triple mutation C59R,S108N,I164L was found in 101/6762 isolates, suggesting that the second  
 399 most likely pathway to the quadruple from our simulations and experimental data,  
 400 S108N/C59R/I164L/N51I, is a possible alternative trajectory to the quadruple mutation. Double  
 401 mutation N51I,S108N was the second most frequent double mutation in the isolate data (198/6762  
 402 isolates), allowing for another alternative pathway S108N/N51I/C59R/I164L. This agrees with the  
 403 third most likely pathway presented by **Lozovsky et al.** (2009), however this pathway was unlikely  
 404 in our simulations.

405 Single mutations C59R and N51I were the second and third most prevalent single mutations in  
 406 our isolate data, found in 5/6762 and 1/6762 of isolates, respectively. They were also the second  
 407 and third most likely first step in our pathway predictions ('*PfDHFR\_total\_pathway\_probabilities.csv*').  
 408 Single mutation I164L was absent from the isolate data and had zero probability of being selected  
 409 as the first step of our evolutionary trajectories.

410 A Chi-squared analysis revealed the worldwide distribution of mutations is significantly dif-

411 ferent than would be expected if there was no preferred evolutionary pathway, and the muta-  
412 tions which were over-represented were those involved in the most likely pathway inferred above  
413 S108N/C59R/N51I/I164L (see Appendix 2 and Appendix 2 - Figure 1). This provides further support  
414 that the epistatic interactions between the mutations determine the order of fixation resulting in  
415 preferred pathways to the quadruple mutation.

416 Considering the set of four *PvDHFR* mutations (N50I, S58R, S117N and I173L), in our isolate  
417 data, the mutations S58R and S117N are fixed at these locations and the wild-type alleles are now  
418 considered to have an Arginine at codon 58 and Asparagine at codon 117. However in *Jiang et al.*  
419 (2013) they consider the wild-type allele to have a Serine at codons 58 and 117 and therefore we  
420 have changed our definition of the wild-type allele to agree with *Jiang et al. (2013)* for ease of  
421 comparison with their evolutionary pathways and our own.

422 The most frequent single mutation was S117N (70/847 isolates), the most frequent double mu-  
423 tation was S58R,S117N (237/847) and the only observed triple mutation was S58R,S117N,I173L  
424 (2/847) (Figure ??). The quadruple mutation was not observed in our isolate data, and has not  
425 been reported in the literature either. By considering the frequency of the possible combinations  
426 of mutations, we inferred the evolution towards triple mutation S58R,S117N,I173L most likely oc-  
427 curs via pathway S117N/S58R/I173L. This corresponds to the fifth most likely pathway to a triple  
428 mutation when considering all pathways observed in our simulations, however this pathway is not  
429 observed in any of the most frequent pathways at any of the four concentrations studied in *Jiang*  
430 *et al. (2013)*.

431 Single mutation S58R was the second most frequent single mutation in our isolate data (20/847).  
432 This supports the predicted first evolutionary steps in *Jiang et al. (2013)* which were predicted to  
433 be S58R for the highest pyrimethamine concentration and S117N for three lower concentrations  
434 of pyrimethamine, which suggests both single mutations are possible, but S117N is more likely  
435 for a lower pyrimethamine concentrations. An alternative pathway to the triple mutation could  
436 therefore be S58R/S117N/I173L, which may be more likely under higher pyrimethamine concen-  
437 trations. This corresponds to the most likely pathway to a triple mutation in our simulations and is  
438 part of the second most likely pathway to the quadruple mutation at the highest pyrimethamine  
439 concentration considered in *Jiang et al. (2013)*.

440 A Chi-squared test on the frequency distributions of the single and double *PvDHFR* mutations  
441 (the triple mutations were too infrequent to include in the analysis, see Appendix 2 and Appendix  
442 2 -Figure 1 for more details) revealed the worldwide distribution of *PvDHFR* mutations is signifi-  
443 cantly different than would be expected if there were no preferred order of fixation of this set of  
444 mutations, with S117N and S58R,S117N being over-represented in the single and double distribu-  
445 tions, respectively. This supports our inference that pathway S117N/S58R/I173L is the most likely  
446 pathway in the worldwide data.

#### 447 **Analysis of geographical distribution of mutations found in our isolate data reveals** 448 **alternative pathways to resistance**

449 We next considered the evolutionary trajectories by geographical location to determine if there are  
450 any differences in the inferred trajectories compared to the global trajectories, and which areas  
451 agree with the trajectories predicted by our simulations. The *P. falciparum* isolates were grouped  
452 in to seven geographical regions, as defined by the United Nations Statistics Division: South Amer-  
453 ica (Brazil, Colombia and Peru), West Africa (Benin, Burkina Faso, Cameroon, Cape Verde, Cote  
454 d'Ivoire, Gabon, Gambia, Ghana, Guinea, Mali, Mauritania, Nigeria and Senegal), Middle Africa  
455 (Congo [DRC]), Eastern Africa (Eritrea, Ethiopia, Kenya, Madagascar, Malawi, Tanzania, Uganda),  
456 Southern Asia (Bangladesh), Southeastern Asia (Cambodia, Indonesia, Laos, Myanmar, Thailand  
457 and Vietnam) and Melanesia (Papua New Guinea). The *P. vivax* isolates were grouped into seven  
458 broad geographical regions, as defined by the United Nations Statistics Division: Central America  
459 (Mexico), South America (Brazil, Colombia, Guyana, Panama, Peru), Eastern Africa (Ethiopia, Er-  
460 itrea, Madagascar, Sudan, Uganda), Southern Asia (Afghanistan, Bangladesh, India, Pakistan, Sri

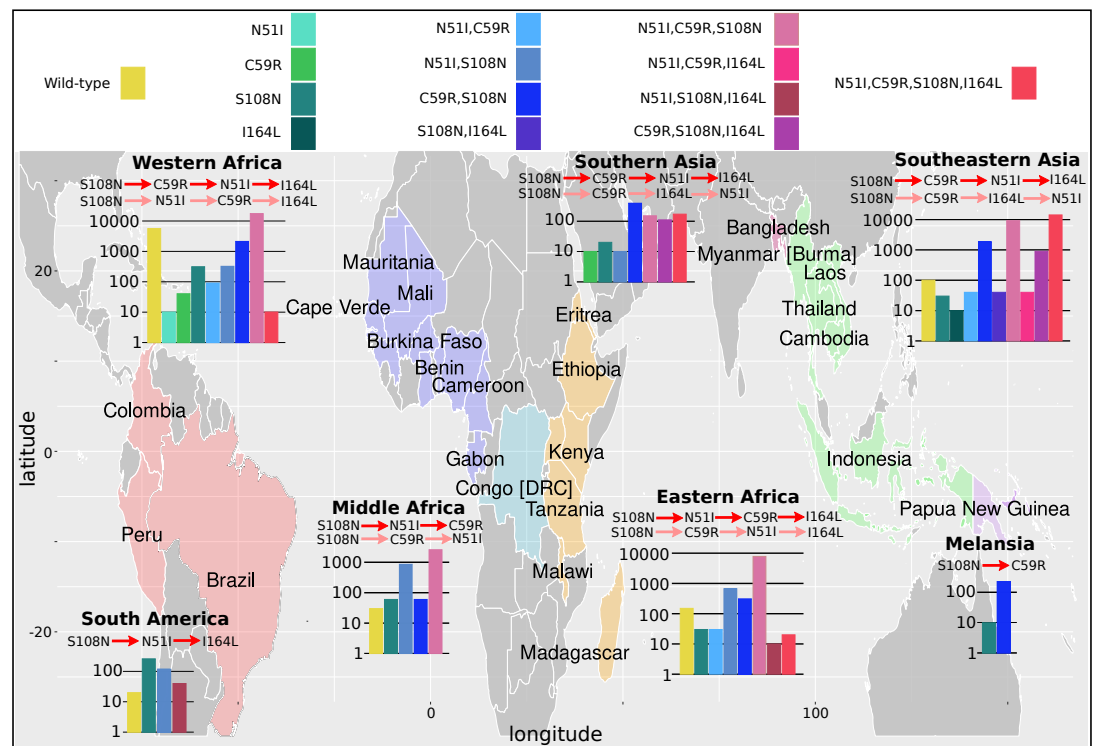

**Figure 3.** The *PfDHFR* isolate data was grouped into seven geographical areas: South America, West Africa, Middle Africa, Eastern Africa, Southern Asia, Southeastern Asia and Melanesia. The bar charts display the frequency (log scale) of the combinations of the four mutations N51I, C59R, S108N and I164L. The frequency data has been multiplied by a factor of 10 to enable clear identification of those mutations occurring in one isolate only. The most likely evolutionary trajectory inferred from the frequency of combinations are included above the corresponding frequency chart from which the pathways were inferred indicated by mutations separated by dark red arrows. Alternative pathways are indicated by mutations separated by light red arrows. Where only single mutations are present a pathway is not inferred. (See Supplementary data folder 'PfDHFR/IsolateMutationFrequency' for the frequency of all mutations found in the isolate data from these regions).

461 Lanka), Southeastern Asia (Cambodia, Indonesia, Laos, Malaysia, Myanmar, Philippines, Thailand  
 462 and Vietnam), Eastern Asia (China) and Melanesia (Papua New Guinea). The mutation frequency  
 463 data discussed in this section for each country can be found in Supplementary data folders 'PfD-  
 464 HFR/IsolateMutationFrequency' and 'PvDHFR/IsolateMutationFrequency'. For an analysis of the  
 465 frequencies and inferred pathways per country per region, as well as information on additional  
 466 mutations found in the data, see Supplementary text.

467 As in the previous section, we inferred the most likely pathway by assuming the most frequent  
 468 mutation at each step corresponds to the most likely evolutionary trajectory. The inferred most  
 469 likely pathway to the quadruple mutation agreed with the main pathway, S108N/C59R/N51I/I164L,  
 470 predicted by our evolutionary model and the data presented in *Lozovsky et al. (2009)*, as well  
 471 as the most likely pathway inferred by considering the frequency of the worldwide *PfDHFR* iso-  
 472 late data in Western Africa (S108N: 31/2594; C59R,S108N: 211/2594; N51I,C59R,S108N: 1739/2594;  
 473 N51I,C59R,S108N,I164L: 1/2594), Southern Asia (S108N: 2/86; C59R,S108N: 39/86; N51I,C59R,S108N:  
 474 15/86; N51I,C59R,S108N,I164L: 17/86) and Southeastern Asia (S108N: 3/2650; C59R,S108N: 186/2650;  
 475 N51I,C59R,S108N: 920/2650; N51I,C59R,S108N,I164L: 1419/2650). Additionally, the alternative world-  
 476 wide pathway S108N/C59R/I164L/N51I was inferred to be an alternative in Southern Asia  
 477 (C59R,S108N,I164L: 11/86) and Southeastern Asia (C59R,S108N,I164L: 90/2650), corresponding to  
 478 the second most likely pathway to the quadruple predicted by our simulations, the data in *Lozovsky*  
 479 *et al. (2009)* and worldwide frequency data.

480 This main pathway to the quadruple mutation was also inferred to be a possible alternative  
481 pathway in Eastern Africa (S108N: 3/904; C59R,S108N: 31/904; N51I,C59R,S108N: 782/904,  
482 N51I,C59R,S108N,I164L: 2/904). However, in Eastern Africa S108N/N51I/C59R/I164L was the most  
483 likely pathway to the quadruple mutation (S108N,N51I: 67/904), which corresponds to the third  
484 most likely pathway presented in *Lozovsky et al. (2009)* and inferred from the total frequency data,  
485 but which was unlikely in our simulations. This was also an alternative pathway in Western Africa  
486 (S108N,N51I: 32/2594).

487 Furthermore, the quadruple mutation was not observed in the isolate data from Middle Africa,  
488 South America, and Melanesia. In Middle Africa, evolution up to the triple mutation N51I,C59R,S108N  
489 was observed and the most likely inferred pathway to this mutation was S108N/N51I/C59R (S108N:  
490 6/359; N51I,S108N: 86/359; N51I,C59R,S108N: 258/359), with an alternative less likely pathway of  
491 S108N/C59R/N51I (C59R,S108N: 6/359), corresponding to the thirteenth and first most likely trajec-  
492 tories to a triple mutation in our simulations, respectively. In South America, evolution up to the  
493 triple mutation N51I,S108N,I164L was observed in the isolate data and was inferred to follow the  
494 pathway S108N/N51I/I164L (S108N: 26/50, N51I,S108N: 12/50; N51I,S108N,I164L: 4/50), however  
495 this pathway does not occur in our simulations. In Melanesia, evolution up to the double mutation  
496 C59R,S108N was observed in the isolate data and was inferred using the frequency data to have  
497 followed the pathway S108N/C59R (S108N: 1/119; C59R,S108N: 23/119), which corresponds to the  
498 most likely pathway of all our evolutionary runs.

499 We performed an analysis of the significance of the regional frequency distributions (see Ap-  
500 pendix 3 and Appendix 3 - Figure 2). All regions had mutations which were significantly over- or  
501 underrepresented compared to what would be expected from the worldwide distribution. The  
502 overrepresented mutations were always part of the inferred most likely evolutionary pathway for  
503 each region. This suggests any differences in the inferred pathways between the regions and the  
504 worldwide data are significant. For example, in South America (Appendix 3 Figure 2d), the three  
505 mutations involved in the most likely inferred pathway (single mutation S108N, double mutation  
506 N51I,S108N and triple mutation N51I,S108N,I164L) are all overrepresented. These mutations are in-  
507 volved in the most likely inferred pathway in that region (S108N/N51I/I164L), suggesting this region  
508 is indeed following a different evolutionary trajectory to what we would expect from the worldwide  
509 data (see Supplementary Text for detailed analysis of all regions).

510 Next, we considered the frequency of combinations of the four *PvDHFR* mutations in different  
511 geographical regions and used these frequencies to infer evolutionary trajectories (Figure 4). As  
512 mentioned previously, the quadruple mutation is not observed in the isolate data and so we will  
513 infer trajectories up to triple mutant combinations of the four mutations where possible, and com-  
514 pare to the most likely pathways to triple mutations in our simulations and in the experimental data.  
515 Triple mutation S58R,S117N,I173L was the only triple mutant combination observed in the isolate  
516 data and was only found in South America. Analyzing the frequency of the constituent mutations  
517 (S117N: 34/257; S58R,S117N: 74/257; S58R,S117N,I173L: 2/257), the most likely inferred pathway  
518 to this mutation is S117N/S58R/I173L. This was the fifth most likely triple mutation pathway in our  
519 simulations, however it was not an observed pathway in *Jiang et al. (2013)*. There are two other  
520 possible pathways inferred from the frequency data to this triple mutation: S117N/I173L/S58R  
521 (S117N,I173L: 1/257), and S58R/S117N/I173L (S58R: 9/257). Pathway S117N/I173L/S58R was the  
522 third most likely pathway to a triple mutation in our simulations but was not observed in the sim-  
523 ulations in *Jiang et al. (2013)* and S58R/S117N/I173L the most likely pathway to a triple mutation  
524 in our simulations and was observed as part of the second most likely pathway to the quadruple  
525 mutation at the highest pyrimethamine concentration considered in *Jiang et al. (2013)*.

526 Evolution only up to double mutation S58R,S117N was found in Southeastern Asia, Eastern  
527 Africa and Melanesia and S117N/S58R was the most likely fixation order in Eastern Africa, whilst  
528 S58R/S117N was the most likely fixation order in Southeastern Asia and Melanesia. Pathways  
529 S58R/S117N and S117N/S58R were the second and fourth most likely double mutation pathways in  
530 our simulations. In Southern Asia, evolution up to double mutations S58R,S117N and N50I,S117N



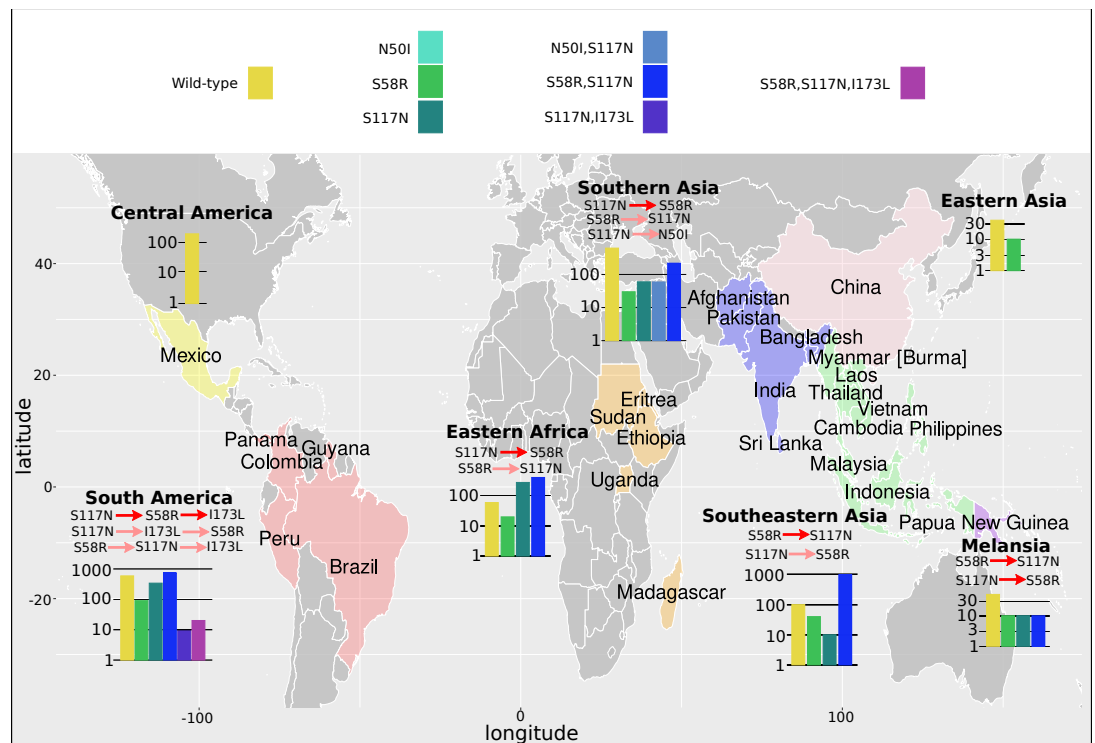

**Figure 4.** The *PvDHFR* isolate data was grouped into seven geographical areas: Central America, South America, Eastern Africa, Southern Asia, Eastern Asia, Southeastern Asia and Melanesia. The bar charts display the frequency (log scale) of the combinations of the four mutations N50I, S58R, S117N and I173L. The frequency data has been multiplied by a factor of 10 to enable clear identification of those mutations occurring in one isolate only. The most likely evolutionary trajectory inferred from the frequency of combinations are included above the corresponding frequency chart from which the pathways were inferred indicated by mutations separated by dark red arrows. Alternative pathways are indicated by mutations separated by light red arrows. Where only single mutations are present a pathway is not inferred. (See Supplementary Text for further explanation and see Supplementary data folder 'PvDHFR/IsolateMutationFrequency' for the frequency of all mutations found in the isolate data from these regions).

531 was observed, following pathways S117N/S58R and S117N/N50I, respectively (S58R: 3/37, S117N:  
 532 6/37, N50I,S117N: 6/37, S58R,S117N:22/37), with the pathway S117N/S58R appearing to be more  
 533 prevalent. In Eastern Asia, evolution only up to single mutation S58R was observed and in Central  
 534 America no steps in the evolutionary pathway including combinations of these four mutations  
 535 were found.

536 We performed an analysis of the significance of the regional distributions, similar to described  
 537 above for *PfDHFR*, however the frequencies of the four *PvDHFR* in many of the regions was too  
 538 small to definitively draw conclusions (see Appendix 3 and Appendix 3 - Figure 2 for more details).  
 539 However, from this analysis it does appear that the distribution of mutations in South America  
 540 is very similar to the worldwide distribution (Appendix 3 -Figure 2d) and this region is following  
 541 the same inferred evolutionary pathway as the pathway inferred from the worldwide data  
 542 (S117N/S58R/I173L). The distribution of mutations in Eastern Africa is similar to the worldwide  
 543 distribution (Appendix 3 - Figure 2a), however this region is enriched for single mutation S117N  
 544 and appears to have not evolved to the double mutant step in the most likely worldwide pathway  
 545 (S58R,S117N) as frequently as would be expected, suggesting it is at an earlier stage of evolution  
 546 compared to the worldwide distribution. Finally, double mutation N50I,S117N is overrepresented  
 547 in Southern Asia (Appendix 3 - Figure 2e), suggesting an alternative evolutionary pathway may be  
 548 occurring in this region.

## 549 Discussion

550 We have presented a method for predicting the most likely evolutionary trajectories to multiple mu-  
551 tants by parameterizing thermodynamic evolutionary model using Flex ddG predictions. The most  
552 likely pathways predicted by our model to the pyrimethamine-resistant quadruple *Pf*DHFR mutant  
553 correspond well to those predicted in *Lozovsky et al. (2009)*, generated using experimentally de-  
554 termined IC50 values of *Pf*DHFR pyrimethamine binding. The two most likely pathways based on  
555 experimental IC50 values were found in the top two most likely pathways to the quadruple mu-  
556 tation based on our simulations using predictions of binding free energy. Whilst our simulations  
557 disagreed with the simulations in *Lozovsky et al. (2009)* in terms of which were the most frequently  
558 realized pathways out of the total number of runs, where a realized pathway does not necessarily  
559 have to reach the quadruple mutation, our model is able to capture the most likely order of fixation  
560 of mutations leading to a particular multiple mutant in general agreement with the simulations in  
561 *Lozovsky et al. (2009)*.

562 We also simulated the most likely evolutionary trajectories to the *Pv*DHFR quadruple muta-  
563 tion N50I,S58R,S117N,I173L and compared our results to those predicted in *Jiang et al. (2013)*.  
564 They considered the relative growth rates of the different alleles at different drug concentrations  
565 when simulating evolutionary trajectories, which incorporate both change in pyrimethamine bind-  
566 ing affinity ( $K_i$ ) and catalytic activity ( $k_{cat}$ ). Our top two most likely pathways to the quadruple cor-  
567 respond to their top two most likely pathways for the highest pyrimethamine concentration they  
568 consider, albeit in reverse order. At high pyrimethamine concentrations, it is likely mutations that  
569 significantly reduce binding affinity will be selectively favoured even if there is a slight reduction  
570 in catalytic activity. Indeed, *Rodrigues et al. (2016)* observed a clear tradeoff between catalytic  
571 activity and binding affinity for increased drug resistance and found that whilst many molecular  
572 features affect drug resistance, drug binding affinity was the key determinant of drug resistance  
573 in later stages of evolution. This may be why our predictions agree well their predictions for high  
574 pyrimethamine concentration, but not for low-to-middle pyrimethamine concentrations, because  
575 even though ligand concentration is included in our equation for protein fitness (Eq. 1), our model  
576 cannot account for adaptive conflict between  $K_i$  and  $k_{cat}$ . This highlights a limitation of our method  
577 as it only accounts for changes in binding affinity and does not account for changes in protein  
578 function.

579 As previously mentioned, DHFR catalyzes the reduction of substrate DHF via oxidation of cofac-  
580 tor NADPH. Therefore, in the case of the DHFR enzyme, a future iteration of the model could include  
581 the impact resistance mutations have on binding of these two ligands, as a proxy for changes to  
582 enzyme function. However, this would require a much more complex model of protein fitness and  
583 would be much more computationally expensive.

584 A further limitation of the evolutionary model is that it operates in the weak mutation regime,  
585 in which the mutation rate is so low that mutations appear and fix in isolation. However, this  
586 assumption breaks down when considering large microbial populations where clonal interference  
587 means that mutations can arise simultaneously and compete for fixation (*Gerrish and Lenski, 1998*).  
588 This can lead to a process known as ‘greedy adaptation’, in which the mutation of larger beneficial  
589 effect is fixed with certainty (*Jain et al., 2011*). Clonal interference has been shown to emerge  
590 rapidly in laboratory cultivated *P. falciparum*, where the parasite cycles through only asexual stages,  
591 suggesting it may influence the dynamics of the emergence of resistance (*Jett et al., 2020*). The  
592 evolutionary model used here may therefore overestimate the fixation probability of mutations  
593 with milder beneficial effects and underestimate the fixation probability of mutations with larger  
594 beneficial effects (*de Visser and Krug, 2014*). Future iterations of this work could be improved by  
595 making using a fixation probability that models of clonal interference such as the work of *Gerrish*  
596 *and Lenski (1998)* and *Campos et al. (2004)*. However, such models are more difficult to implement  
597 as they can require species-specific derivations for certain functions.

598 Mutations occurring at a drug-binding site may also reduce the protein’s thermodynamic stabil-

599 ity (*Wang et al., 2002*) and therefore may not be selected for, even if they improve the resistance  
600 phenotype. Therefore, our model may also be improved by including selection for mutations that  
601 do not reduce thermodynamic stability relative to the wild-type enzyme. However, it must also be  
602 noted that most proteins are marginally stable (*Vogl et al., 1997; Ruvinov et al., 1997*), a property  
603 which may have evolved either as an evolutionary spandrel (*Taverna and Goldstein, 2002; Gold-*  
604 *stein, 2011*) (a characteristic that arises as a result of non-adaptive processes which is then used  
605 for adaptive purposes (*Gould et al., 1979*) or due to selection for increased flexibility to improve  
606 certain functionalities (*Závodszy et al., 1998; Tsou, 1998*). Therefore, the model would also have  
607 to account for the fact that a resistance mutation that increases protein stability relative to the  
608 wild-type stability may also result in a reduction in fitness.

609 Despite the limitations of our computational method to predict evolutionary trajectories by  
610 only considering the impact on drug binding, it is able to accurately predict the most likely order  
611 of fixation of mutations in a trajectory in general agreement with trajectories determined using  
612 experimental values such as IC50 or more complex fitness landscapes informed by multiple pa-  
613 rameters including drug concentration and growth rates. This supports the findings in *Rodrigues*  
614 *et al. (2016)*, that drug binding is a major determinant of resistance, especially at later stages of evo-  
615 lution. It also suggests evolution in such landscapes is more predictable than might be expected,  
616 since trajectories can be predicted considering only the impact on binding affinity.

617 We also inferred evolutionary pathways from the total frequency in worldwide clinical isolate  
618 data as well as from different geographical regions. This analysis suggests evolutionary pathways  
619 may be inferred from the frequency of mutations found in isolate data, however it requires a large  
620 number of isolates to properly sample the mutations in the population. Furthermore, this method  
621 can only be used to predict trajectories once resistance has emerged in a population, whereas the  
622 computational method presented here can predict evolutionary trajectories before introduction  
623 of a new drug.

624 This analysis also suggested that different regions often follow different evolutionary trajecto-  
625 ries and that the most likely evolutionary trajectories predicted by our model, and experimental  
626 trajectories, are not always the most prevalent. Geographical differences in the distribution of  
627 resistant alleles may be the result of drug regimens and gene flow in parasite populations. Com-  
628 bination drug SP was first used in 1967 to treat *P. falciparum* in Southeastern Asia, and resistance  
629 was first noted that same year on the Thai-Cambodia and Thai-Myanmar borders (*Björkman and*  
630 *Phillips-Howard, 1990*). In Africa, SP was first used in the 1980s, with resistance occurring later  
631 that decade. However, analysis of *PfDHFR* genotypes and microsatellite haplotypes surrounding  
632 the *DHFR* gene in Southeastern Asia and Africa suggest a single resistant lineage that appeared in  
633 Southeastern Asia accumulated multiple mutations, including the triple N51I,C59R,S108N (*Roper*  
634 *et al., 2004; Mita et al., 2007*), migrated to Africa and spread throughout the continent (*Maiga et al.,*  
635 *2007; McCollum Andrea et al., 2007, 2008*). Variation in the frequency of *PfDHFR* mutants across  
636 Africa occurs because of differences in the timing of chloroquine withdrawal and introduction of  
637 SP, as well as continued use of SP for intermittent preventive treatment (IPTp) in pregnant women  
638 residing in areas of moderate to high malaria transmission intensity (*Turkiewicz et al., 2020; Raven-*  
639 *hall et al., 2016*).

640 Pyrimethamine resistance increased in West Papua in the early 1960s following the introduc-  
641 tion of mass drug administration (*Verdrager, 1986*). Microsatellite haplotype analysis suggests  
642 C59R,S108N in Melanesia has two lineages, one of which originated in Southeastern Asia whilst  
643 the other evolved indigenously *Roper et al. (2004)*.

644 Pyrimethamine resistance in South America looks surprisingly different from the distributions  
645 in Africa and Southeastern Asia. SP was introduced in South America and low-level resistance  
646 was first noted in Colombia in 1981 (*Espinal et al., 1985*). Microsatellite haplotype analysis sug-  
647 gests pyrimethamine resistance evolved indigenously in South America, with at least two distinct  
648 lineages detected. A triple mutant lineage (C50I,N51I,S108N) was identified in Venezuela that possi-  
649 bly evolved from double mutant N51I,S108N (?). A second triple mutant lineage (N51I,S108N,I164L)

650 was identified in Peru and Bolivia which also possibly evolved from a distinct double mutant (N51I,S108N)  
651 lineage (*Zhou et al., 2008*).

652 In general, the *PvDHFR* gene is much more polymorphic than *PfDHFR* gene, with over 20 alleles  
653 observed in a limited geographical sampling (*Hawkins et al., 2007*), whereas fewer *PfDHFR* alle-  
654 les have been observed despite much more extensive surveillance with non-synonymous changes  
655 and insertions/deletions occurring rarely (*Gregson and Plowe, 2005*). It also appears that the ori-  
656 gin of *PvDHFR* pyrimethamine resistance mutation is much more diverse than *PfDHFR*. *Hawkins*  
657 *et al. (2008)* investigated isolates from Colombia, India, Indonesia, Papua New Guinea, Sri Lanka,  
658 Thailand and Vanuatu and found multiple origins of the double *PvDHFR* mutant 58R,117N in Thai-  
659 land, Indonesia and Papua New Guinea/Vanuatu. *Shaukat et al. (2021)* assessed the resistance  
660 mutations in Punjab, Pakistan and found multiple origins of single mutation S117N and a common  
661 origin of double mutant 58R,S117N and triple mutant 58R,117N,I173L. This is in contrast to the  
662 evolutionary origin of pyrimethamine resistance in *PfDHFR*, where mutations in Africa shared a  
663 common origin with a resistance lineage from Asia.

664 This highlights the need to distinguish between geographical regions and account for existing  
665 resistance alleles within that region and trace their lineages when attempting to predict the next  
666 step in evolutionary trajectories to highly resistant multiple mutants. Given the current dominant  
667 resistance allele from a specific region, our method could be used to predict the most likely next  
668 steps from a subset of likely mutations.

669 We have presented a computational method for predicting the most likely evolutionary tra-  
670 jectories that has demonstrated good agreement with trajectories predicted experimentally and  
671 has the advantage of being much quicker and more cost-effective than laboratory-based methods.  
672 This method can be applied to any system in which a drug binds to a target molecule, provided a  
673 structure of the complex exists or can be produced via structural modelling. Given the threat an-  
674 timicrobial resistance poses, methods to accurately and efficiently predict future trajectories are  
675 vital and can inform treatment strategies and aid drug development.

## 676 **Methods and Materials**

### 677 **Homology Modelling**

678 Homology modelling was carried out in Modeller (*Webb and Sali, 2016*) to produce complete struc-  
679 tures of the target proteins bound to their drug molecules. Several crystal structures of *PfDHFR*  
680 exist in the Protein Data Bank (PDB). The entry 3QGT provides the crystal structure of wild-type  
681 *PfDHFR* complexed with NADPH, dUMP and pyrimethamine, however residues in the ranges 86-95  
682 and 232-282 are missing from the structural model. Homology modelling was used to complete the  
683 structure using a second wild-type *PfDHFR* structure PDB entry 1J3I along with a wild-type *PvDHFR*  
684 structure PDB entry 2BLB.

685 To produce a complete structural model of *PvDHFR*, PDB entry 2BLB was used as a template,  
686 which provides the X-ray crystal structure of wild-type *P. vivax* DHFR in complex with pyrimethamine.  
687 This structure was only missing a loop section between residues 87-105 and so Modeller was used  
688 to build this missing loop.

### 689 **Flex ddG binding free energy predictions**

690 The Rosetta Flex ddG protocol was used to estimate the change in binding free energy upon muta-  
691 tion,  $\Delta\Delta G = \Delta G_{mut} - \Delta G_{WT}$ , for each step in all possible mutational trajectories for a set of stepwise  
692 resistance mutations (see Supplementary data Flex\_ddG folder for examples of a Rosetta script,  
693 resfile and command line. The protein-ligand structure files and ligand parameter files can be  
694 found in the folders named for the specific targets). To predict the change in binding free energy  
695 for a single or multiple mutation, we used the structure of the target protein with the drug molecule  
696 bound as input to Flex ddG and ran the protocol for 250 times per mutation to produce a distri-  
697 bution of predictions of the change in the free energy of binding. We then found the mean of the

698 distribution to produce a single estimate of the change in the binding free energy for the mutation,  
699 denoted  $\Delta\Delta G_X^*$  for mutation X.

700 To predict the stepwise evolutionary trajectories, we must consider the interactions between  
701 the mutations in the pathway. The interaction energy (or epistasis) in the binding free energy  
702 between two mutations X and Y, can be written  $\epsilon_{X,Y} = \Delta\Delta G_{X,Y} - (\Delta\Delta G_X + \Delta\Delta G_Y)$ . This quantifies by  
703 how much the change in binding free energy of the double mutant X,Y deviates from additivity of  
704 the single mutants, where each are calculated with respect to the wild-type. Therefore, the change  
705 in binding free energy when mutation Y occurs in the background of mutation X can be written  
706  $\Delta\Delta G_{X/Y} = \Delta\Delta G_{X,Y} - \Delta\Delta G_X$ , where  $\Delta\Delta G_{X/Y} = \Delta\Delta G_Y + \epsilon_{X,Y}$ .

707 For a third mutation, Z, occurring in the background of double mutation X,Y, the interaction  
708 energy between Z and X,Y is  $\epsilon_{X,Y,Z} = \Delta\Delta G_{X,Y,Z} - (\Delta\Delta G_{X,Y} + \Delta\Delta G_Z)$ . The quantity  $\epsilon_{X,Y,Z}$  is not the  
709 same as the third order epistasis between mutations X, Y, and Z, or the interaction energy  $\epsilon_{XYZ} =$   
710  $\Delta\Delta G_{X,Y,Z} - (\Delta\Delta G_X + \Delta\Delta G_Y + \Delta\Delta G_Z)$  as it does not account for the interaction between X and Y,  
711 rather it only quantifies the interaction between Z and the two mutations X and Y. Therefore, the  
712 change in binding free energy when mutation Z occurs in the background of double mutant X,Y  
713 can be calculated as  $\Delta\Delta G_{X,Y/Z} = \Delta\Delta G_{X,Y,Z} - \Delta\Delta G_{X,Y}$ , where  $\Delta\Delta G_{X,Y/Z} = \Delta\Delta G_Z + \epsilon_{X,Y,Z}$ .

714 To estimate the change in binding free energy when mutation Y occurs in the background  
715 of mutation X,  $\Delta\Delta G_{X/Y}$  for stepwise pathway X/Y, we subtracted the predictions  $\Delta\Delta G_X^i$  for the  
716 first mutation X, from the predictions for the double mutation X,Y,  $\Delta\Delta G_{X,Y}^i$ , to create a set of  
717 250 'predictions' for the change in binding free energy when Y occurs in the background of X,  
718  $\Delta\Delta G_{X/Y}^i$  i.e.  $\Delta\Delta G_{X/Y}^i = \Delta\Delta G_{X,Y}^i - \Delta\Delta G_X^i$  for  $i = \{1, \dots, 150\}$ . To estimate the change in bind-  
719 ing free energy when mutation Z occurs in the background of mutations X and Y we calculated  
720  $\Delta\Delta G_{X,Y/Z}^i = \Delta\Delta G_{X,Y,Z}^i - \Delta\Delta G_{X,Y}^i$ . We applied a similar method for the quadruple mutations, so that  
721 we had a set of 'predictions' for each step in the possible evolutionary trajectories.

## 722 Simulating Evolutionary Trajectories

723 The Rosetta energy function is a mix of a combination of physic-based and statistics-based po-  
724 tentials and so raw predictions using this function don't up match up with physical energy units  
725 (e.g. kcal/mol or kJ/mol). However, the authors of Flex ddG applied a generalized additive model  
726 (GAM)-like approach to the Rosetta energy function to reweight its terms and to fit experimentally  
727 known values (in kcal/mol). The resulting nonlinear reweighting model reduced the absolute error  
728 between the predictions and experimental values and so improved the agreement with experimen-  
729 tally determined interface  $\Delta\Delta G$  values. They found that by doing this the Flex ddG predictions of  
730 binding free energy changes were in a similar range as experimental binding free energy changes  
731 and observed improved correlation and classification of mutations as stabilising or destabilising  
732 (Barlow *et al.*, 2018). Therefore, we assume Flex ddG can provide approximate predictions of bind-  
733 ing free energy changes comparable to experimental changes in kcal/mol and can therefore be  
734 used to parameterize a thermodynamic model.

735 To predict the most likely evolutionary trajectories to reach a quadruple mutant we used a  
736 model based in thermodynamics and statistical mechanics where the fitness of a protein is deter-  
737 mined by the probability it would not be bound to a ligand,  $P_{unbound}$ . We consider a two-state system  
738 in which the protein can either be bound or unbound and do not explicitly account for if the protein  
739 is folded or unfolded in either the bound or unbound state. For ligand concentration  $[L]$  it can be  
740 shown that the probability a protein is unbound is

$$P_{unbound} = \frac{1}{\frac{[L]}{K_d} + 1} \quad (1)$$

741 where  $K_d$  is the protein-ligand dissociation constant and can be calculated as  $c_0 e^{\Delta G/kT}$  where  $c_0$  is  
742 a reference ligand concentration (set here arbitrarily to 1M),  $\Delta G$  is the protein-ligand binding free  
743 energy,  $k$  is the Boltzmann constant and  $T$  is the temperature in Kelvin.



744 Starting from the wild-type protein, with binding free energy  $\Delta G_{WT}$  and fitness  $P_{unbound}^{WT}$ , we ex-  
745 tract one sample  $i$  from the 250 values of the predicted binding affinity changes for the single  
746 mutations to determine the binding free energy after mutation  $X$ ,  $\Delta G_X^i = \Delta G_{WT} + \Delta \Delta G_X^i$ , and calcu-  
747 late the fitness of each single mutant protein  $P_{unbound}^{X(i)}$ . We can calculate the probability the mutation  
748 will fix in the population using the Kimura fixation probability for a haploid organism

$$P_{fix} = \frac{1 - e^{-2s}}{1 - e^{-2sN_e}} \quad (2)$$

749 where  $N_e$  is the effective population size (set to  $10^6$  as previous models in [Eccleston et al. \(2021\)](#);  
750 [Pollock et al. \(2012\)](#)) and  $s$  is the selection coefficient  $s = (P_{unbound}^{X,i} - P_{unbound}^{WT}) / P_{unbound}^{WT}$ . We also took  
751 in to account the mutational bias of *Plasmodium falciparum* using the nucleotide mutation matrix  
752 calculated in [Lozovsky et al. \(2009\)](#). The probabilities of fixation for each mutation were normalised  
753 by the sum of the probabilities of fixation for all possible mutations at that step in the trajectory. A  
754 mutation is then chosen with a probability proportional to this normalised probability of fixation.

755 Once a single mutation is chosen, the binding free energy is set to  $\Delta G_X^i$  of the chosen mutation,  
756 and a value is sampled from the distribution of each of the possible next steps,  $X/Y$  in the trajectory  
757 i.e.  $\Delta \Delta G_{X/Y}^i$ . This continues until the end of the trajectory is reached. If the fixation probabilities  
758 of all mutations sampled at a step are effectively zero, no mutation is chosen at that step and the  
759 algorithm begins again by choosing a single mutation. Therefore, not all of the runs produce a com-  
760 plete trajectory and some will terminate before reaching the quadruple mutation. The algorithm  
761 was written in R.

762 We calculate the probabilities,  $P_i$ , of each realized pathway (even those which don't reach the  
763 quadruple mutation) by dividing the total number of times that specific pathway occurs by the  
764 number of runs. We calculate the probability of a particular step by dividing the number of times  
765 that step occurs in all realized pathways by the total number of runs.

## 766 SNP data

767 *P. falciparum* and *P. vivax* data was obtained from publicly available raw sequence data from Euro-  
768 pean Nucleotide Archive. These data include Illumina raw sequences from the MalariaGEN Com-  
769 munity Project for *P. falciparum* ([Ahouidi et al., 2021](#)) and *P. vivax* ([Adam et al., 2022](#)). *P. vivax* data  
770 additionally includes the Public Health England Malaria Reference Laboratory isolates from return-  
771 ing travelers to UK from regions where malaria is endemic (study accession number ERP128476)  
772 ([Benavente et al., 2021](#)). Data was filtered and processed to SNP data with the methodology de-  
773 scribed in the recent publications [Turkiewicz et al. \(2020\)](#) and [Benavente et al. \(2021\)](#) respectively.  
774 In this study, we analysed genotype data for 6,762 high-quality isolates from 32 countries across  
775 regions of Africa, South Eastern Asia, Oceania and South America to identify the genetic diversity in  
776 the *PfDHFR* gene. A similar analysis was carried out on 847 *P. vivax* isolates spanning 25 countries  
777 across Eastern Africa, Southern Asia, Southeastern Asia, Eastern Asia and South America to iden-  
778 tify genetic diversity in *PvDHFR* gene. SNPs occurring in non-unique, low quality or low coverage  
779 regions were discarded, and those with a missense effect in the candidate genes were analysed.  
780 Functional annotation was done with *SnpEff* (version 5.0) ([Cingolani et al., 2012](#)) with the following  
781 options: *-no-downstream -no-upstream*.

## 782 Data availability

783 Supplementary data can be found at [10.5281/zenodo.7082168](https://zenodo.org/record/7082168)

## 784 Acknowledgments

785 R.C.E and N.F. are funded by the Medical Research Council UK (Grant no. MR/T000171/1). T.G.C is  
786 funded by the Medical Research Council UK (Grant no. MR/M01360X/1, MR/N010469/1, MR/R025576/1,  
787 MR/R020973/1 and MR/T000171/1) and BBSRC (Grant no. BB/R013063/1). S.C is funded by Medical  
788 Research Council UK grants (MR/M01360X/1, MR/R025576/1, and MR/R020973/1) and Bloomsbury

789 SET. E.M is funded by a Newton Institutional Links Grant (British Council, no. 261868591). The fun-  
790 ders had no role in study design, data collection and analysis, decision to publish, or preparation  
791 of the manuscript. R.C.E would like to thank Tanushree Tunstall (London School of Hygiene and  
792 Tropical Medicine) for the helpful discussions. R.C.E would also like to thank Professor Richard  
793 Goldstein (University College London) for introducing her to the evolutionary algorithm used in  
794 this paper.

## 795 References

- 796 **Achaz G**, Rodriguez-Verdugo A, Gaut BS, Tenaillon O. The reproducibility of adaptation in the light of experi-  
797 mental evolution with whole genome sequencing. *Adv Exp Med Biol.* 2014; 781:211–31. doi: 10.1007/978-  
798 94-007-7347-9\_11.
- 799 **Adam I**, Alam MS, Alemu S, Amaratunga C, Amato R, Andrianaranjaka V, Anstey NM, Aseffa A, Ashley E, Assefa A,  
800 Auburn S, Barber BE, Barry A, Batista Pereira D, Cao J, Chau NH, Chotivanich K, Chu C, Dondorp AM, Drury E,  
801 et al. An open dataset of Plasmodium vivax genome variation in 1,895 worldwide samples. *Wellcome Open*  
802 *Res.* 2022; 7:136. doi: 10.12688/wellcomeopenres.17795.1.
- 803 **Ahouidi A**, Ali M, Almagro-Garcia J, Amambua-Ngwa A, Amaratunga C, Amato R, Amenga-Etego L, Andagalu B,  
804 Anderson TJC, Andrianaranjaka V, Apinjoh T, Ariani C, Ashley EA, Auburn S, Awandare GA, Ba H, Baraka V,  
805 Barry AE, Bejon P, Bertin GI, et al. An open dataset of Plasmodium falciparum genome variation in 7,000  
806 worldwide samples. *Wellcome Open Res.* 2021; 6:42. doi: 10.12688/wellcomeopenres.16168.2.
- 807 **Aldeghi M**, Gapsys V, de Groot BL. Accurate Estimation of Ligand Binding Affinity Changes upon Protein  
808 Mutation. *ACS central science.* 2018; 4(12):1708–1718. <https://pubmed.ncbi.nlm.nih.gov/30648154https://www.ncbi.nlm.nih.gov/pmc/articles/PMC6311686/>, doi: 10.1021/acscentsci.8b00717.
- 810 **Aldeghi M**, Gapsys V, de Groot BL. Predicting Kinase Inhibitor Resistance: Physics-Based and Data-Driven  
811 Approaches. *ACS Central Science.* 2019; 5(8):1468–1474. <https://doi.org/10.1021/acscentsci.9b00590>, doi:  
812 10.1021/acscentsci.9b00590.
- 813 **Alford RAO**, Leaver-Fay A, Jeliakov JR, O'Meara MJ, DiMaio FP, Park HAO, Shapovalov MV, Renfrew PD, Mulligan  
814 VK, Kappel K, Labonte JW, Pacella MAOX, Bonneau R, Bradley P, Dunbrack J R L, Das R, Baker D, Kuhlman B,  
815 Kortemme T, Gray JAO. The Rosetta All-Atom Energy Function for Macromolecular Modeling and Design. *J*  
816 *Chem Theory Comput.* 2017; 13:3031–3048. doi: 10.1021/acs.jctc.7b00125.
- 817 **Andersson DI**, Hughes D. Persistence of antibiotic resistance in bacterial populations. *FEMS Microbiol Reviews.*  
818 2011; 35:901–911. doi: 10.1111/j.1574-6976.2011.00289.x.
- 819 **Barlow KA**, Ó Conchúir S, Thompson S, Suresh P, Lucas JE, Heinonen M, Kortemme T. Flex ddG: Rosetta  
820 Ensemble-Based Estimation of Changes in Protein–Protein Binding Affinity upon Mutation. *The Jour-*  
821 *nal of Physical Chemistry B.* 2018; 122(21):5389–5399. <https://doi.org/10.1021/acs.jpcc.7b11367>, doi:  
822 10.1021/acs.jpcc.7b11367.
- 823 **Benavente ED**, Manko E, Phelan J, Campos M, Nolder D, Fernandez D, Velez-Tobon G, Castaño AT, Dombrowski  
824 JG, Marinho CRF, Aguiar ACC, Pereira DB, Sriprawat K, Nosten F, Moon R, Sutherland CJ, Campino S, Clark TG.  
825 Distinctive genetic structure and selection patterns in Plasmodium vivax from South Asia and East Africa. *Nat*  
826 *Commun.* 2021; 12(1):3160. doi: 10.1038/s41467-021-23422-3.
- 827 **Björkman A**, Phillips-Howard PA. The epidemiology of drug-resistant malaria. *Transactions of The Royal Society*  
828 *of Tropical Medicine and Hygiene.* 1990; 84(2):177–180. [https://doi.org/10.1016/0035-9203\(90\)90246-B](https://doi.org/10.1016/0035-9203(90)90246-B), doi:  
829 10.1016/0035-9203(90)90246-B.
- 830 **Blair JMA**, Webber MA, Baylay AJ, Ogbolu DO, Piddock LJV. Molecular mechanisms of antibiotic resistance.  
831 *Nature Reviews Microbiology.* 2015; 13(1):42–51. <https://doi.org/10.1038/nrmicro3380>, doi: 10.1038/nrmi-  
832 cro3380.
- 833 **Brooks DR**, Wang P, Fau Read M, Read M, Fau Watkins WM, Watkins Wm Fau Sims PF, Sims Pf Fau Hyde JE, Hyde  
834 JE. Sequence variation of the hydroxymethyl-dihydropterin pyrophosphokinase: dihydropteroate synthase  
835 gene in lines of the human malaria parasite, Plasmodium falciparum, with differing resistance to sulfadoxine.  
836 *Eur, J Biochem.* 1994; 224(2):397–405. doi: 10.1111/j.1432-1033.1994.00397.x.
- 837 **Campos PRA**, Adami C, Wilke CO. In: Ciobanu G, Rozenberg G, editors. *Modelling Stochastic Clonal Interference*  
838 *Berlin, Heidelberg: Springer Berlin Heidelberg; 2004. p. 21–38. https://doi.org/10.1007/978-3-642-18734-6\_2,*  
839 *doi: 10.1007/978-3-642-18734-6\_2.*

- 840 **Cingolani P**, Platts A, Wang le L, Coon M, Nguyen T, Wang L, Land SJ, Lu X, Ruden DM. A program for annotating  
841 and predicting the effects of single nucleotide polymorphisms, SnpEff: SNPs in the genome of *Drosophila*  
842 *melanogaster* strain w1118; iso-2; iso-3. *Fly (Austin)*. 2012; 6(2):80–92. doi: [10.4161/fly.19695](https://doi.org/10.4161/fly.19695).
- 843 **Costelloe C**, Metcalfe C, Lovering A, Mant D, Hay AD. Effect of antibiotic prescribing in primary care on anti-  
844 antimicrobial resistance in individual patients: systematic review and meta-analysis. *BMJ*. 2010; 340:c2096.  
845 <http://www.bmj.com/content/340/bmj.c2096.abstract>, doi: [10.1136/bmj.c2096](https://doi.org/10.1136/bmj.c2096).
- 846 **Davies J**, Davies D. Origins and evolution of antibiotic resistance. *Microbiology and molecular biology reviews*  
847 : MMBR. 2010; 74(3):417–433. <https://pubmed.ncbi.nlm.nih.gov/20805405>[https://www.ncbi.nlm.nih.gov/pmc/](https://www.ncbi.nlm.nih.gov/pmc/articles/PMC2937522/)  
848 [articles/PMC2937522/](https://www.ncbi.nlm.nih.gov/pmc/articles/PMC2937522/), doi: [10.1128/MMBR.00016-10](https://doi.org/10.1128/MMBR.00016-10).
- 849 **Eccleston RC**, Pollock DD, Goldstein RA. Selection for cooperativity causes epistasis predominately between  
850 native contacts and enables epistasis-based structure reconstruction. *Proceedings of the National Academy*  
851 *of Sciences*. 2021; 118(16):e2010057118. <http://www.pnas.org/content/118/16/e2010057118.abstract>, doi:  
852 [10.1073/pnas.2010057118](https://doi.org/10.1073/pnas.2010057118).
- 853 **Enne VI**. Reducing antimicrobial resistance in the community by restricting prescribing: can it be done?  
854 *Journal of Antimicrobial Chemotherapy*. 2010; 65(2):179–182. <https://doi.org/10.1093/jac/dkp443>, doi:  
855 [10.1093/jac/dkp443](https://doi.org/10.1093/jac/dkp443).
- 856 **Espinal TCA**, Cortes CGT, Guerra P, Arias R AE. Sensitivity of *Plasmodium Falciparum* to Antimalarial Drugs in  
857 Colombia. *The American Journal of Tropical Medicine and Hygiene*. 1985; 34(4):675–680. [https://www.ajtmh.](https://www.ajtmh.org/view/journals/tpmd/34/4/article-p675.xml)  
858 [org/view/journals/tpmd/34/4/article-p675.xml](https://www.ajtmh.org/view/journals/tpmd/34/4/article-p675.xml), doi: [10.4269/ajtmh.1985.34.675](https://doi.org/10.4269/ajtmh.1985.34.675).
- 859 **Ferlan JT**, Mookherjee S Fau Okezie IN, Okezie In Fau Fulgence L, Fulgence L Fau Sibley CH, Sibley CH. Muta-  
860 genesis of dihydrofolate reductase from *Plasmodium falciparum*: analysis in *Saccharomyces cerevisiae* of  
861 triple mutant alleles resistant to pyrimethamine or WR99210. *Mol Biochem, Parasitol*. 2001; 113(0166-6851  
862 (Print)):139–150. doi: [10.1016/s0166-6851\(01\)00207-9](https://doi.org/10.1016/s0166-6851(01)00207-9).
- 863 **Gerrish PJ**, Lenski RE. The fate of competing beneficial mutations in an asexual population. *Genetica*. 1998;  
864 102(0):127. <https://doi.org/10.1023/A:1017067816551>, doi: [10.1023/A:1017067816551](https://doi.org/10.1023/A:1017067816551).
- 865 **Goldstein RA**. The evolution and evolutionary consequences of marginal thermostability in proteins. *Pro-*  
866 *teins: Structure, Function, and Bioinformatics*. 2011; 79(5):1396–1407. <https://doi.org/10.1002/prot.22964>,  
867 doi: <https://doi.org/10.1002/prot.22964>.
- 868 **Gong LI**, Suchard MA, Bloom JD. Stability-mediated epistasis constrains the evolution of an influenza protein.  
869 *eLife*. 2013; 2:e00631. <https://doi.org/10.7554/eLife.00631>, doi: [10.7554/eLife.00631](https://doi.org/10.7554/eLife.00631).
- 870 **Gould SJ**, Lewontin RC, Maynard Smith J, Holliday R. The spandrels of San Marco and the Panglossian paradigm:  
871 a critique of the adaptationist programme. *Proceedings of the Royal Society of London Series B Biological*  
872 *Sciences*. 1979; 205(1161):581–598. <https://doi.org/10.1098/rspb.1979.0086>, doi: [10.1098/rspb.1979.0086](https://doi.org/10.1098/rspb.1979.0086).
- 873 **Gregson A**, Plowe CV. Mechanisms of Resistance of Malaria Parasites to Antifolates. *Pharmacological Reviews*.  
874 2005; 57(1):117. <http://pharmrev.aspetjournals.org/content/57/1/117.abstract>, doi: [10.1124/pr.57.1.4](https://doi.org/10.1124/pr.57.1.4).
- 875 **Hastings MD**, Porter KM, Maguire JD, Susanti I, Kania W, Bangs MJ, Sibley CH, Baird JK. Dihydrofolate Re-  
876 ductase Mutations in *Plasmodium vivax* from Indonesia and Therapeutic Response to Sulfadoxine plus  
877 Pyrimethamine. *The Journal of Infectious Diseases*. 2004; 189(4):744–750. <https://doi.org/10.1086/381397>,  
878 doi: [10.1086/381397](https://doi.org/10.1086/381397).
- 879 **Hawkins VN**, Joshi H Fau Rungsihirunrat K, Rungsihirunrat K Fau Na-Bangchang K, Na-Bangchang K Fau Sibley  
880 CH, Sibley CH. Antifolates can have a role in the treatment of *Plasmodium vivax*. *Trends, Parasitol*. 2007;  
881 25(5):213–222.
- 882 **Hawkins VN**, Auliff A, Prajapati SK, Rungsihirunrat K, Hapuarachchi HC, Maestre A, O’Neil MT, Cheng Q, Joshi H,  
883 Na-Bangchang K, Sibley CH. Multiple origins of resistance-conferring mutations in *Plasmodium vivax* dihydro-  
884 folate reductase. *Malaria Journal*. 2008; 7(1):72. [https://doi.org/10.1186/1475-](https://doi.org/10.1186/1475-2875-7-72)  
885 [2875-7-72](https://doi.org/10.1186/1475-2875-7-72), doi: [10.1186/1475-](https://doi.org/10.1186/1475-2875-7-72)
- 886 **Jain K**, Krug J, Park SC. EVOLUTIONARY ADVANTAGE OF SMALL POPULATIONS ON COMPLEX FITNESS  
887 LANDSCAPES. *Evolution*. 2011; 65(7):1945–1955. <https://doi.org/10.1111/j.1558-5646.2011.01280.x>, doi:  
888 <https://doi.org/10.1111/j.1558-5646.2011.01280.x>.

- 889 **Jett C**, Dia A, Cheeseman IH. Rapid emergence of clonal interference during malaria parasite cultivation. *bioRxiv*.  
890 2020; p. 2020.03.04.977165. <http://biorxiv.org/content/early/2020/03/05/2020.03.04.977165.abstract>, doi:  
891 [10.1101/2020.03.04.977165](https://doi.org/10.1101/2020.03.04.977165).
- 892 **Jiang PP**, Corbett-Detig RB, Hartl DL, Lozovsky ER. Accessible Mutational Trajectories for the Evolution of  
893 Pyrimethamine Resistance in the Malaria Parasite *Plasmodium vivax*. *Journal of Molecular Evolution*. 2013;  
894 77(3):81–91. <https://doi.org/10.1007/s00239-013-9582-z>, doi: 10.1007/s00239-013-9582-z.
- 895 **Karmakar M**, Rodrigues CHM, Horan K, Denholm JT, Ascher DB. Structure guided prediction of Pyrazinamide re-  
896 sistance mutations in *pncA*. *Scientific Reports*. 2020; 10(1):1875. <https://doi.org/10.1038/s41598-020-58635-x>,  
897 doi: 10.1038/s41598-020-58635-x.
- 898 **Khan AI**, Dinh Dm Fau Schneider D, Schneider D Fau Lenski RE, Lenski Re Fau Cooper TF, Cooper TF. Negative  
899 epistasis between beneficial mutations in an evolving bacterial population. *Science*. 2011; 332(6034):1193–  
900 1196.
- 901 **Kompis IM**, Islam K Fau Then RL, Then RL. DNA and RNA synthesis: antifolates. *Chem, Rev*. 2005; 105(2):593–  
902 620. doi: 10.1021/cr0301144.
- 903 **Korsinczky M**, Fischer K Fau Chen N, Chen N Fau Baker J, Baker J Fau Rieckmann K, Rieckmann K Fau Cheng  
904 Q, Cheng Q. Sulfadoxine resistance in *Plasmodium vivax* is associated with a specific amino acid in di-  
905 hydropteroate synthase at the putative sulfadoxine-binding site. *Antimicrob Agents, Chemother*. 2004;  
906 48(6):2214–2222. doi: [10.1128/AAC.48.6.2214-2222.2004](https://doi.org/10.1128/AAC.48.6.2214-2222.2004).
- 907 **Levy SB**, Marshall B. Antibacterial resistance worldwide: causes, challenges and responses. *Nature Medicine*.  
908 2004; 10(12):S122–S129. <https://doi.org/10.1038/nm1145>, doi: 10.1038/nm1145.
- 909 **Lobkovsky A**, Koonin E. Replaying the Tape of Life: Quantification of the Predictability of Evolution. *Frontiers*  
910 *in Genetics*. 2012; 3. <https://www.frontiersin.org/article/10.3389/fgene.2012.00246>.
- 911 **Lozovsky ER**, Chookajorn T Fau Brown KM, Brown Km Fau Imwong M, Imwong M Fau Shaw PJ, Shaw PJ Fau Kam-  
912 chonwongpaisan S, Kamchonwongpaisan S Fau Neafsey DE, Neafsey De Fau Weinreich DM, Weinreich Dm  
913 Fau Hartl DL, Hartl DL. Stepwise acquisition of pyrimethamine resistance in the malaria parasite. *Proc Natl*  
914 *Acad Sci, U S A*. 2009; 106(29):12025–12030. doi: [10.1073/pnas.0905922106](https://doi.org/10.1073/pnas.0905922106).
- 915 **Maïga O**, Djimdé AA, Hubert V, Renard E, Aubouy A, Kironde F, Nsimba B, Koram K, Doumbo OK, Bras JL, Clain J.  
916 A Shared Asian Origin of the Triple-Mutant *dhfr* Allele in *Plasmodium falciparum* from Sites across Africa. *The*  
917 *Journal of Infectious Diseases*. 2007; 196(1):165–172. <https://doi.org/10.1086/518512>, doi: 10.1086/518512.
- 918 **McCollum Andrea M**, Basco Leonardo K, Tahar R, Udhayakumar V, Escalante Ananias A. Hitchhiking and  
919 Selective Sweeps of *Plasmodium falciparum* Sulfadoxine and Pyrimethamine Resistance Alleles in a Pop-  
920 ulation from Central Africa. *Antimicrobial Agents and Chemotherapy*. 2008; 52(11):4089–4097. <https://doi.org/10.1128/AAC.00623-08>,  
921 doi: [10.1128/AAC.00623-08](https://doi.org/10.1128/AAC.00623-08).
- 922 **McCollum Andrea M**, Mueller K, Villegas L, Udhayakumar V, Escalante Ananias A. Common Origin and Fixation  
923 of *Plasmodium falciparum* *dhfr* and *dhps* Mutations Associated with Sulfadoxine-Pyrimethamine Resistance  
924 in a Low-Transmission Area in South America. *Antimicrobial Agents and Chemotherapy*. 2007; 51(6):2085–  
925 2091. <https://doi.org/10.1128/AAC.01228-06>, doi: [10.1128/AAC.01228-06](https://doi.org/10.1128/AAC.01228-06).
- 926 **Melnyk AH**, Wong A, Kassen R. The fitness costs of antibiotic resistance mutations. *Evol, Appl*. 2015; 8(3):273–  
927 283. doi: [10.1111/eva.12196](https://doi.org/10.1111/eva.12196).
- 928 **Mita T**, Tanabe K, Takahashi N, Tsukahara T, Eto H, Dysoley L, Ohmae H, Kita K, Krudsood S, Looareesuwan S,  
929 Kaneko A, Björkman A, Kobayakawa T. Independent Evolution of Pyrimethamine Resistance in *Plasmodium*  
930 *falciparum* Isolates in Melanesia. *Antimicrobial Agents and Chemotherapy*. 2007; 51(3):1071–1077. <https://doi.org/10.1128/AAC.01186-06>,  
931 doi: [10.1128/AAC.01186-06](https://doi.org/10.1128/AAC.01186-06).
- 932 **Palmer ME**, Moudgil A, Feldman MW. Long-term evolution is surprisingly predictable in lattice proteins.  
933 *Journal of The Royal Society Interface*. 2013; 10(82):20130026. <https://doi.org/10.1098/rsif.2013.0026>, doi:  
934 [10.1098/rsif.2013.0026](https://doi.org/10.1098/rsif.2013.0026).
- 935 **Pollock DD**, Pollard ST, Shortt JA, Goldstein RA. In: Pontarotti P, editor. *Mechanistic Models of Protein Evolution*  
936 *Cham: Springer International Publishing*; 2017. p. 277–296. [https://doi.org/10.1007/978-3-319-61569-1\\_15](https://doi.org/10.1007/978-3-319-61569-1_15),  
937 doi: 10.1007/978-3-319-61569-1\_15.

- 938 **Pollock DD**, Thiltgen G, Goldstein RA. Amino acid coevolution induces an evolutionary Stokes shift. *Proceed-*  
939 *ings of the National Academy of Sciences*. 2012; 109(21):E1352. <http://www.pnas.org/content/109/21/E1352>.  
940 [abstract](https://doi.org/10.1073/pnas.1120084109), doi: 10.1073/pnas.1120084109.
- 941 **Portelli S**, Myung Y, Furnham N, Vedithi SC, Pires DEV, Ascher DB. Prediction of rifampicin resistance beyond  
942 the RRDR using structure-based machine learning approaches. *Scientific Reports*. 2020; 10(1):18120. [https://](https://doi.org/10.1038/s41598-020-74648-y)  
943 [doi.org/10.1038/s41598-020-74648-y](https://doi.org/10.1038/s41598-020-74648-y), doi: 10.1038/s41598-020-74648-y.
- 944 **Ravenhall M**, Benavente ED, Mipando M, Jensen AT, Sutherland CJ, Roper C, Sepúlveda N, Kwiatkowski DP,  
945 Montgomery J, Phiri KS, Terlouw A, Craig A, Campino S, Ocholla H, Clark TG. Characterizing the impact of  
946 sustained sulfadoxine/pyrimethamine use upon the *Plasmodium falciparum* population in Malawi. *Malar J*.  
947 2016; 15(1):575. doi: 10.1186/s12936-016-1634-6.
- 948 **Rodrigues JV**, Bershtein S, Li A, Lozovsky ER, Hartl DL, Shakhnovich EI. Biophysical principles predict fitness  
949 landscapes of drug resistance. *Proceedings of the National Academy of Sciences*. 2016; 113(11):E1470. [http://](http://www.pnas.org/content/113/11/E1470.abstract)  
950 [www.pnas.org/content/113/11/E1470.abstract](http://www.pnas.org/content/113/11/E1470.abstract), doi: 10.1073/pnas.1601441113.
- 951 **Roper C**, Pearce R, Nair S, Sharp B, Nosten F, Anderson T. Intercontinental spread of pyrimethamine-resistant  
952 malaria. *Science*. 2004; 305(5687):1124. doi: 10.1126/science.1098876.
- 953 **Ruvinov S**, Wang L, Ruan B, Almog O, Gilliland GL, Eisenstein E, Bryan PN. Engineering the Independent Folding  
954 of the Subtilisin BPN Prodomain : Analysis of Two-State Folding versus Protein Stability. *Biochemistry*. 1997;  
955 36(34):10414–10421. <https://doi.org/10.1021/bi9703958>, doi: 10.1021/bi9703958.
- 956 **Sanjuán R**, Cuevas Jm Fau Moya A, Moya A Fau Elena SF, Elena SF. Epistasis and the adaptability of an RNA  
957 virus. *Genetics*. 2005; 170:1001–1008. doi: 10.1534/genetics.105.040741.
- 958 **Shaukat A**, Ali Q, Raud L, Wahab A, Khan TA, Rashid I, Rashid M, Hussain M, Saleem MA, Sargison ND, Chaudhry  
959 U. Phylogenetic analysis suggests single and multiple origins of dihydrofolate reductase mutations in *Plas-*  
960 *modium vivax*. *Acta Trop*. 2021; 215:105821. doi: 10.1016/j.actatropica.2020.105821.
- 961 **Sirawaraporn W**, Sathikul T, Sirawaraporn R, Yuthavong Y, Santi DV. Antifolate-resistant mutants of *Plas-*  
962 *modium falciparum* dihydrofolate reductase. *Proc Natl Acad Sci U S A*. 1997; 94:1124–1129. doi:  
963 10.1073/pnas.94.4.1124.
- 964 **Snounou G**, White NJ. The co-existence of *Plasmodium*: sidelights from *falciparum* and *vivax* malaria in  
965 Thailand. *Trends in Parasitology*. 2004; 20(7):333–339. [https://www.sciencedirect.com/science/article/pii/](https://www.sciencedirect.com/science/article/pii/S147149220400128X)  
966 [S147149220400128X](https://www.sciencedirect.com/science/article/pii/S147149220400128X), doi: <https://doi.org/10.1016/j.pt.2004.05.004>.
- 967 **Starr TN**, Thornton JW. Epistasis in protein evolution. *Protein science : a publication of the Protein Society*.  
968 2016; 25(7):1204–1218. <https://pubmed.ncbi.nlm.nih.gov/26833806>[https://www.ncbi.nlm.nih.gov/pmc/articles/](https://www.ncbi.nlm.nih.gov/pmc/articles/PMC4918427/)  
969 [PMC4918427/](https://www.ncbi.nlm.nih.gov/pmc/articles/PMC4918427/), doi: 10.1002/pro.2897.
- 970 **Sun D**, Jeannot K, Xiao Y, Knapp CW. Editorial: Horizontal Gene Transfer Mediated Bacterial Antibiotic Re-  
971 sistance. *Frontiers in microbiology*. 2019; 10:1933–1933. <https://pubmed.ncbi.nlm.nih.gov/31507555>[https://www.ncbi.nlm.nih.gov/pmc/articles/](https://www.ncbi.nlm.nih.gov/pmc/articles/PMC6718914/)  
972 [PMC6718914/](https://www.ncbi.nlm.nih.gov/pmc/articles/PMC6718914/), doi: 10.3389/fmicb.2019.01933.
- 973 **Sundqvist M**, Geli P Fau Andersson DI, Andersson Di Fau Sjölund-Karlsson M, Sjölund-Karlsson M Fau Runeha-  
974 gen A, Runehagen A Fau Cars H, Cars H Fau Abelson-Storby K, Abelson-Storby K Fau Cars O, Cars O Fau Kahl-  
975 meter G, Kahlmeter G. Little evidence for reversibility of trimethoprim resistance after a drastic reduction in  
976 trimethoprim use. *J Antimicrob Chemother*. 2010; 65:350–360. doi: 10.1093/jac/dkp387.
- 977 **Szendro Ivan G**, Franke J, de Visser JAGM, Krug J. Predictability of evolution depends nonmonotonically on  
978 population size. *Proceedings of the National Academy of Sciences*. 2013; 110(2):571–576. [https://doi.org/10.](https://doi.org/10.1073/pnas.1213613110)  
979 [1073/pnas.1213613110](https://doi.org/10.1073/pnas.1213613110), doi: 10.1073/pnas.1213613110.
- 980 **Tamer YT**, Gaszek IK, Abdizadeh H, Batur TA, Reynolds KA, Atilgan AR, Atilgan C, Toprak E. High-Order Epistasis  
981 in Catalytic Power of Dihydrofolate Reductase Gives Rise to a Rugged Fitness Landscape in the Presence of  
982 Trimethoprim Selection. *Molecular Biology and Evolution*. 2019; 36(7):1533–1550. [https://doi.org/10.1093/](https://doi.org/10.1093/molbev/msz086)  
983 [molbev/msz086](https://doi.org/10.1093/molbev/msz086), doi: 10.1093/molbev/msz086.
- 984 **Taverna DM**, Goldstein RA. Why are proteins marginally stable? *Proteins: Structure, Function, and Bioinfor-*  
985 *matics*. 2002; 46(1):105–109. <https://doi.org/10.1002/prot.10016>, doi: <https://doi.org/10.1002/prot.10016>.
- 986 **Tsou CL**. Active site flexibility in enzyme catalysis. *Ann N Y Acad Sci*. 1998; 864:1–8. doi: 10.1111/j.1749-  
987 6632.1998.tb10282.x.



- 988 **Turkiewicz A**, Manko E, Sutherland CJ, Diez Benavente E, Campino S, Clark TG. Genetic diversity of the  
989 *Plasmodium falciparum* GTP-cyclohydrolase 1, dihydrofolate reductase and dihydropteroate synthetase  
990 genes reveals new insights into sulfadoxine-pyrimethamine antimalarial drug resistance. *PLoS Genet.* 2020;  
991 16(12):e1009268. doi: [10.1371/journal.pgen.1009268](https://doi.org/10.1371/journal.pgen.1009268).
- 992 **Verdrager J**. Epidemiology of the emergence and spread of drug-resistant falciparum malaria in South-East  
993 Asia and Australasia. *J Trop Med Hyg.* 1986; 89(6):277–89.
- 994 **de Visser JAGM**, Krug J. Empirical fitness landscapes and the predictability of evolution. *Nature Reviews Ge-*  
995 *netics.* 2014; 15(7):480–490. <https://doi.org/10.1038/nrg3744>, doi: 10.1038/nrg3744.
- 996 **Vogl T**, Jatzke C, Hinz HJ, Benz J, Huber R. Thermodynamic Stability of Annexin V E17G: Equilibrium Parameters  
997 from an Irreversible Unfolding Reaction. *Biochemistry.* 1997; 36(7):1657–1668. <https://doi.org/10.1021/bi962163z>,  
998 doi: 10.1021/bi962163z.
- 999 **Vogwill T**, MacLean RC. The genetic basis of the fitness costs of antimicrobial resistance: a meta-analysis  
1000 approach. *Evolutionary applications.* 2015; 8(3):284–295. <https://pubmed.ncbi.nlm.nih.gov/25861386https://www.ncbi.nlm.nih.gov/pmc/articles/PMC4380922/>,  
1001 doi: 10.1111/eva.12202.
- 1002 **Wang P**, Read M, Sims PFG, Hyde JE. Sulfadoxine resistance in the human malaria parasite *Plasmodium falciparum*  
1003 is determined by mutations in dihydropteroate synthetase and an additional factor associated with  
1004 folate utilization. *Mol Microbiol.* 1997; 23(5):979–986.
- 1005 **Wang X**, Minasov G, Shoichet BK. Evolution of an antibiotic resistance enzyme constrained by stability and  
1006 activity trade-offs. *J Mol Biol.* 2002; 320(1):85–95. doi: 10.1016/s0022-2836(02)00400-x.
- 1007 **Webb B**, Sali A. Comparative Protein Structure Modeling Using MODELLER. *Curr Protoc Bioinformatics.* 2016;  
1008 54:5.6.1–5.6.37. doi: [10.1002/cpbi.3](https://doi.org/10.1002/cpbi.3).
- 1009 **Weinreich DM**, Watson RA, Chao L. Perspective: Sign epistasis and genetic constraint on evolutionary trajec-  
1010 tories. *Evolution.* 2005; 59(6):1165–74.
- 1011 **Weinreich DM**, Delaney NF, DePristo MA, Hartl DL. Darwinian Evolution Can Follow Only Very Few Mutational  
1012 Paths to Fitter Proteins. *Science.* 2006; 312(5770):111. [http://science.sciencemag.org/content/312/5770/111.](http://science.sciencemag.org/content/312/5770/111.abstract)  
1013 [abstract](http://science.sciencemag.org/content/312/5770/111.abstract), doi: [10.1126/science.1123539](https://doi.org/10.1126/science.1123539).
- 1014 **WHO**. World Malaria Report: 2021. World Health Organization, Geneva, Switzerland; 2021.
- 1015 **Yuthavong Y**, Yuvaniyama J, Fau Chitnumsub P, Chitnumsub P, Fau Vanichtanankul J, Vanichtanankul J,  
1016 Fau Chusacultanachai S, Chusacultanachai S, Fau Tarnchompoo B, Tarnchompoo B, Fau Vilaivan T, Vilaivan  
1017 T, Fau Kamchonwongpaisan S, Kamchonwongpaisan S. Malarial (*Plasmodium falciparum*) dihydrofolate  
1018 reductase-thymidylate synthase: structural basis for antifolate resistance and development of effective in-  
1019 hibitors. *Parasitology.* 2005; 130(0031-1820 (Print)):249–259. doi: 10.1017/s003118200400664x.
- 1020 **Závodszy P**, Kardos J, Svingor A, Petsko GA. Adjustment of conformational flexibility is a key event in the  
1021 thermal adaptation of proteins. *Proceedings of the National Academy of Sciences.* 1998; 95(13):7406. [http:](http://www.pnas.org/content/95/13/7406.abstract)  
1022 [//www.pnas.org/content/95/13/7406.abstract](http://www.pnas.org/content/95/13/7406.abstract), doi: [10.1073/pnas.95.13.7406](https://doi.org/10.1073/pnas.95.13.7406).
- 1023 **Zhou Z**, Griffing SM, de Oliveira AM, McCollum AM, Quezada WM, Arrospide N, Escalante AA, Udhayakumar V.  
1024 Decline in sulfadoxine-pyrimethamine-resistant alleles after change in drug policy in the Amazon region of  
1025 Peru. *Antimicrob Agents Chemother.* 2008; 52(2):739–41. doi: [10.1128/aac.00975-07](https://doi.org/10.1128/aac.00975-07).

## 1026 Appendix 1

### 1027 Comparison of Flex ddG predictions for 35 to 250 runs

1028 For the set of four *Pf*DHFR mutations (N51I, C59R, S108N and I164L) and combinations  
1029 thereof studied in *Lozovsky et al. (2009)*, we ran 35 runs per mutation (as suggested by  
1030 the Flex ddG authors (*Barlow et al., 2018*)) and found the average for each distribution and  
1031 used these predictions to calculate the sum and the interaction energies for the multiple  
1032 mutants. We compared the predictions of the binding free energy change, the sum of the  
1033 independent changes for multiple mutants and the interaction energy to the experimen-  
1034 tal data from *Lozovsky et al. (2009)* and observed Pearson correlations of 0.536, 0.580 and  
1035 0.900, respectively (Appendix 1 - Table 1). We also determined the number of correctly clas-  
1036 sified predictions. For the binding free energy predictions, 5/9 predictions were correctly  
1037 classified as stabilizing or destabilizing, 4/5 of the sum of the independent impacts were cor-  
1038 rectly classified as stabilizing or destabilizing and 2/5 interaction energy predictions were  
1039 correctly classified as either positive or negative. Therefore, whilst the predictions for 35  
1040 runs achieved a good correlation with the data, the predictions of the interaction energy  
1041 (and so the epistasis) using this data were correctly classified for less than half of the data  
1042 set.

1043 Examining the distributions of the predicted change in binding free energy for 35 runs  
1044 for each of the mutations considered in *Lozovsky et al. (2009)* (Appendix 1 - Figure 1) we  
1045 can see that the distributions are not well characterized. We therefore decided to carry out  
1046 a larger number of runs per prediction and determine the number of runs required for the  
1047 rank order of the mutations to converge. We found the rank order of the average of the  
1048 distributions sufficiently converged by 250 runs (Appendix 1 - Figure 3), as demonstrated in  
1049 Appendix 1 - Figure 4 where the gradient of the average for each mutation is close to zero.  
1050 Whilst more runs may have achieved better convergence, because of the time it takes to run  
1051 Flex ddG it is important to achieve a balance between efficiency and accuracy. Whilst these  
1052 new distributions are still not Gaussian, the distributions are better explored (Appendix 1  
1053 - Figure 2). We compared the predictions for 250 runs and the data from *Lozovsky et al.*  
1054 *(2009)* (Table 1) and observed a correlation of 0.611 for the binding free energy data, 0.660  
1055 for the sum of the independent predictions for multiple mutants and 0.756 for the interac-  
1056 tion energy. We found 8/9 binding free energy predictions were correctly classified, 4/5 of  
1057 the sum of the independent predictions were correctly classified and 4/5 of the interaction  
1058 energies were correctly classified. We therefore conclude that the predictions for n=250  
1059 runs present a better agreement with the data presented in *Lozovsky et al. (2009)* in terms  
1060 of compromising between correlation and correct classification, both of which are impor-  
1061 tant here.

| Mutation              | $\Delta\Delta G_{exp}^*$<br>(kcal/mol) | Exp. Sum** | Exp I.E.*** | $\Delta\Delta G_{FlexddG}^\dagger$<br>(kcal/mol) | Sum‡   | I.E.§  |
|-----------------------|----------------------------------------|------------|-------------|--------------------------------------------------|--------|--------|
| N51I                  | -0.783                                 |            |             | -0.156                                           |        |        |
| C59R                  | -0.184                                 |            |             | 0.059                                            |        |        |
| S108N                 | 1.297                                  |            |             | 0.521                                            |        |        |
| I164L                 | -0.351                                 |            |             | -0.661                                           |        |        |
| N51I,S108N            | 1.89                                   | 0.514      | 1.376       | -0.132                                           | 0.365  | -0.497 |
| C59R,S108N            | 2.29                                   | 1.113      | 1.177       | 0.399                                            | 0.580  | -0.183 |
| N51I,C59R,S108N       | 2.595                                  | 0.33       | 2.265       | 0.196                                            | 0.425  | -0.228 |
| C59R,S108N,I164L      | 3.283                                  | 0.762      | 2.521       | -0.004                                           | -0.081 | 0.077  |
| N51I,C59R,S108N,I164L | 3.761                                  | -0.021     | 3.782       | 0.306                                            | -0.237 | 0.542  |
| Pearson Correlation   |                                        |            |             | 0.536                                            | 0.580  | 0.900  |
| Correctly Classified  |                                        |            |             | 5/9                                              | 4/5    | 2/5    |

**Appendix 1—table 1.** Correlation between Flex ddG predictions for 35 runs and experimental data (see table 4 of *Sirawaraporn et al. (1997)*) for *PfDHFR* pyrimethamine resistance mutations.

\*Experimentally measured *PfDHFR* pyrimethamine binding free energy change data from *Sirawaraporn et al. (1997)*

\*\*Sum of experimental values of binding free energy change for independent mutations

\*\*\*Interaction energy calculated as the difference between experimentally measured values of binding free energy change of multiple mutant compared to the sum of the independent mutations involved

†Change in *PfDHFR*-pyrimethamine binding free energy predicted by Flex ddG calculated as the average of the distribution of runs. Free energy predictions from Rosetta are in Rosetta Energy Units, however the authors of Flex ddG applied a generalized additive model to re-weight the predictions and make the output more comparable to units of kcal/mol (*Barlow et al., 2018*)

‡Sum of Flex ddG predictions for independent mutations

§Interaction energy calculated as the difference between Flex ddG predicted binding free energy change of multiple mutant compared to the sum of the independent mutations.

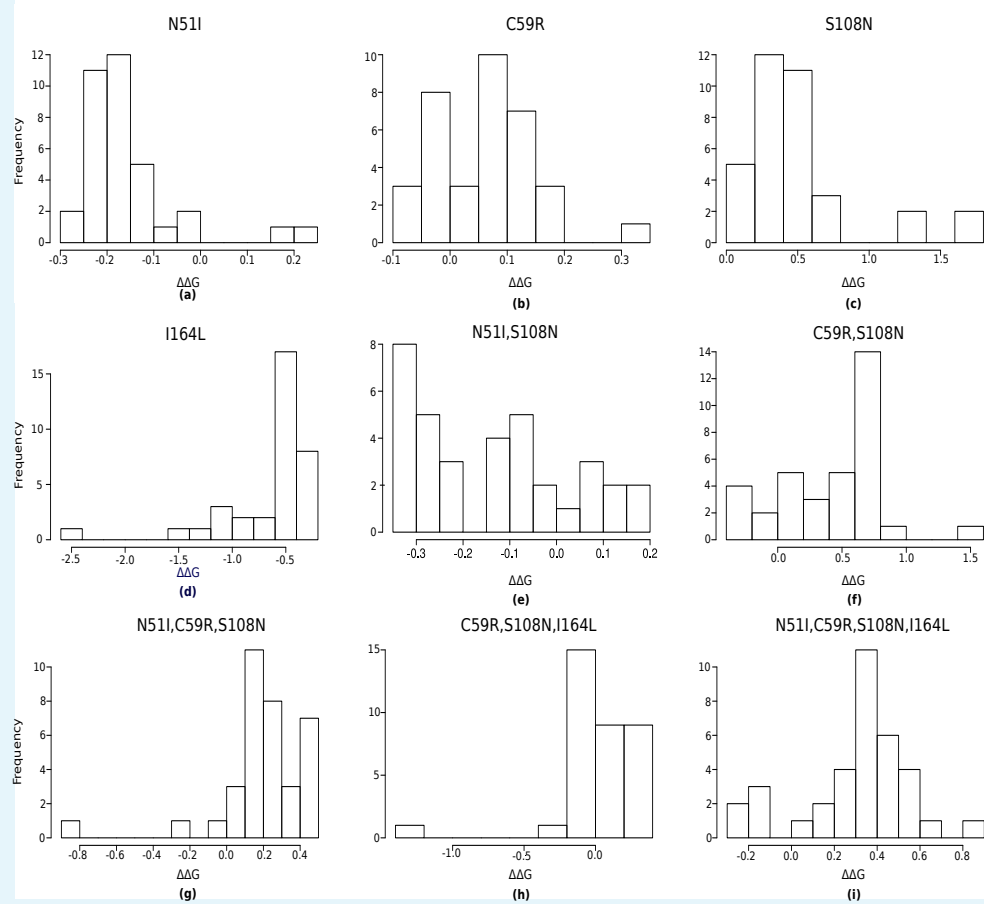

1077  
1078  
1079  
1080  
1082

**Appendix 1—figure 1.** The distribution of pyrimethamine-*Pf*DHFR binding free energy changes predicted by Flex ddG for 35 runs for subset of mutations considered in *Sirawaraporn et al. (1997)* namely a) N51I, b) C59R, c) S108N, d) I164L, e) N51I,S108N, f) C59R,S108N, g) N51I,C59R,S108N, h) C59R,S108N,I164L and i) N51I,C59R,S108N,I164L

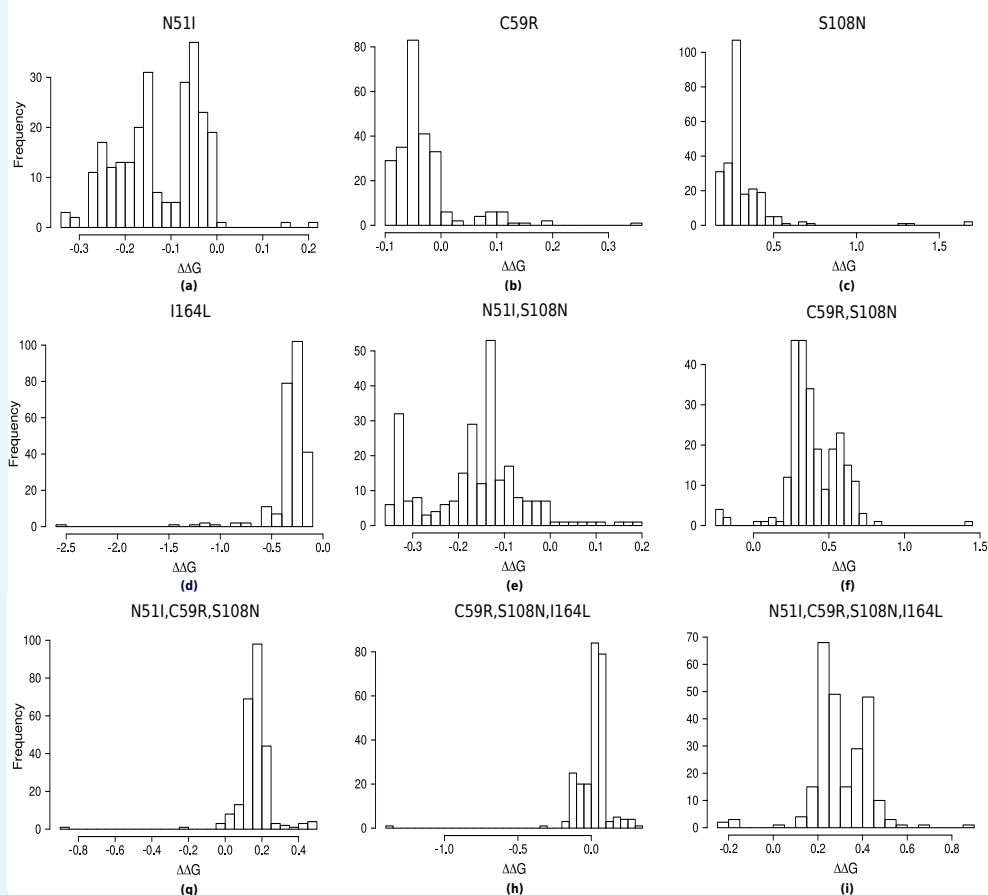

1083  
1084  
1085  
1086  
1088

**Appendix 1—figure 2.** The distribution of pyrimethamine-*PfdHFR* binding free energy changes predicted by Flex ddG for 250 runs for subset of mutations considered in *Sirawaraporn et al. (1997)* namely a) N51I, b) C59R, c) S108N, d) I164L, e) N51I,S108N, f) C59R,S108N, g) N51I,C59R,S108N, h) C59R,S108N,I164L and i) N51I,C59R,S108N,I164L

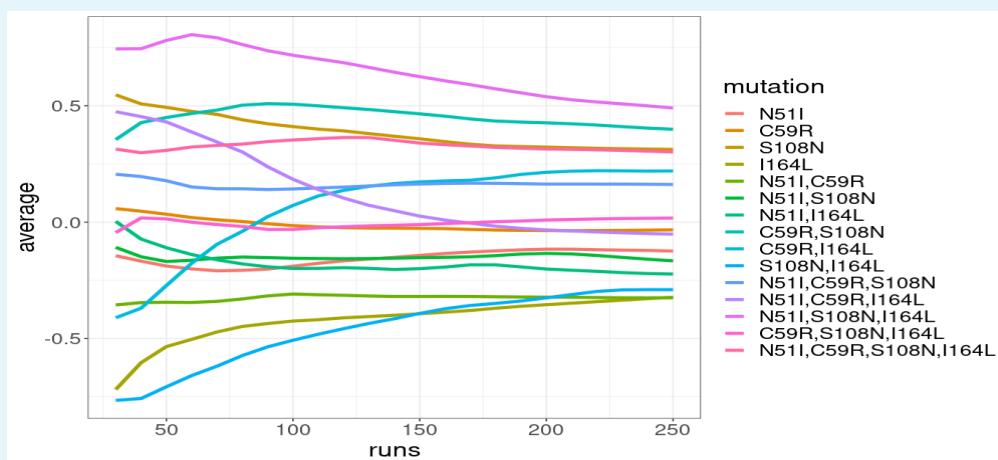

1089  
1090  
1091  
1093

**Appendix 1—figure 3.** The average of the Flex ddG prediction distributions for  $n=30, \dots, 250$  runs for the *PfdHFR* mutation combinations.



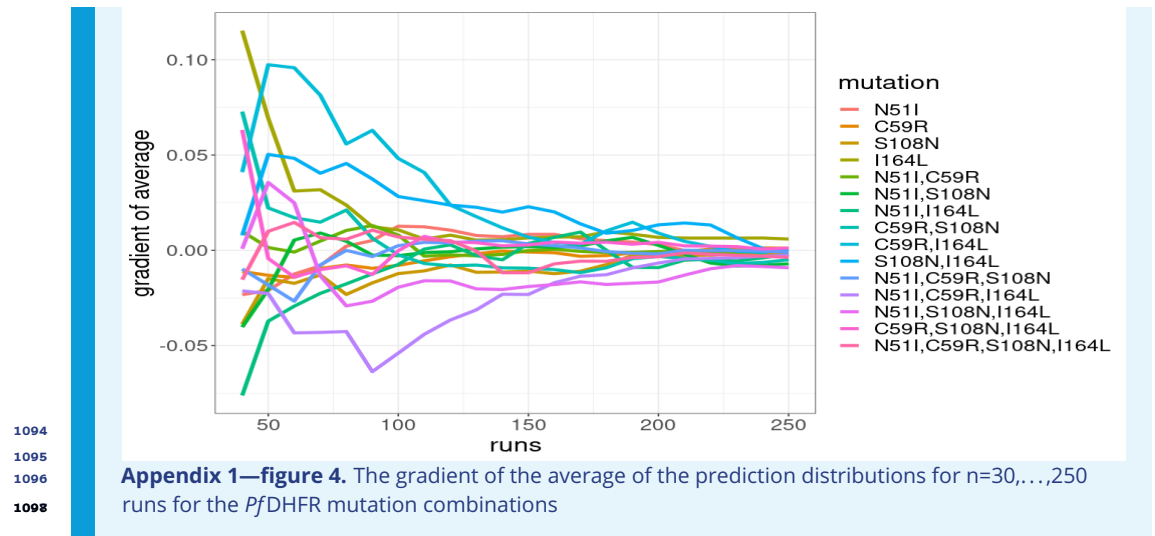

## 1099 Appendix 2

### 1100 **Assessing the significance of the frequency distribution of mutations** 1101 **in the worldwide isolate data**

1102 We performed a Chi-squared test on the worldwide distribution of the four *Pf*DHFR mu-  
1103 tations considered here, to determine if the mutations involved in the most likely inferred  
1104 pathway were overrepresented compared to what we would expect under a null hypothesis  
1105 in which there is no preferred pathway. Under this null hypothesis, if there was no preferred  
1106 pathway, the single mutations would be observed at the same frequency, the double muta-  
1107 tions would be observed at the same frequency and the triple mutations would be observed  
1108 at the same frequency. Therefore, we carried out three separate Chi-squared tests on the  
1109 distributions of the single, double and triple mutations. (It would be difficult to carry out a  
1110 Chi-squared test on the combined distribution of these mutations because we would not  
1111 expect the single, double and triple mutations to have the same frequency and it would  
1112 be difficult to determine what their appropriate relative frequencies would be). The Chi-  
1113 squared tests determined all three distributions were significantly different from the null  
1114 hypothesis ( $p_{singles} < 0.01$ ,  $p_{doubles} = 0$ ,  $p_{triples} = 0$ ). Analysing the residuals of each distribution  
1115 (Appendix 2 - Figure 1), S108N was found to be overrepresented in the distribution of single  
1116 mutations, C59R,S108N was overrepresented in the distribution of double mutations and  
1117 N51I,C59R,S108N was overrepresented in the triple mutation distribution. These mutations  
1118 are the single, double and triple mutations involved in the most likely inferred pathway for  
1119 the worldwide data, supporting our assertion this is the most likely stepwise trajectory to  
1120 the quadruple mutation.

1121 We performed a Chi-squared test for the distribution of the *Pv*DHFR mutations in a  
1122 similar way to *Pf*DHFR, however the frequency of triple mutants in the *Pv*DHFR worldwide  
1123 dataset was not large enough to accurately carry out the test on the distribution of triple  
1124 mutations. Therefore, we only carried out the test for the distribution of single and double  
1125 mutations (Appendix 2 - Figure 1), with the null hypothesis that if there were no preferred  
1126 order of fixation, the frequency of the single mutations would be equal and the frequency  
1127 of the double mutations would be equal. The Chi-squared test revealed the distribution of  
1128 both the single and double mutants is significantly different from what we would expect  
1129 from the null hypothesis ( $p_{singles} < 0.01$  and  $p_{doubles} < 0.01$  for the single and double distri-  
1130 butions, respectively). Analysing the residuals of each distribution, S117N was found to be  
1131 overrepresented among the single mutations and S58R,S117N was found to be overrepre-  
1132 sented among the double mutations. This provides support for the idea that epistasis de-  
1133 termines the order of fixation and suggests that the most likely pathway to the only triple  
1134 mutation observed (S58R,S117N,I173L) occurs via pathway S117N/S58R/I173L. This corre-  
1135 sponds to the fifth most likely pathway to a triple mutation when considering all pathways  
1136 observed in our simulations, however this pathway is not observed in any of the most fre-  
1137 quent pathways at any of the four concentrations studied in *Jiang et al. (2013)*.

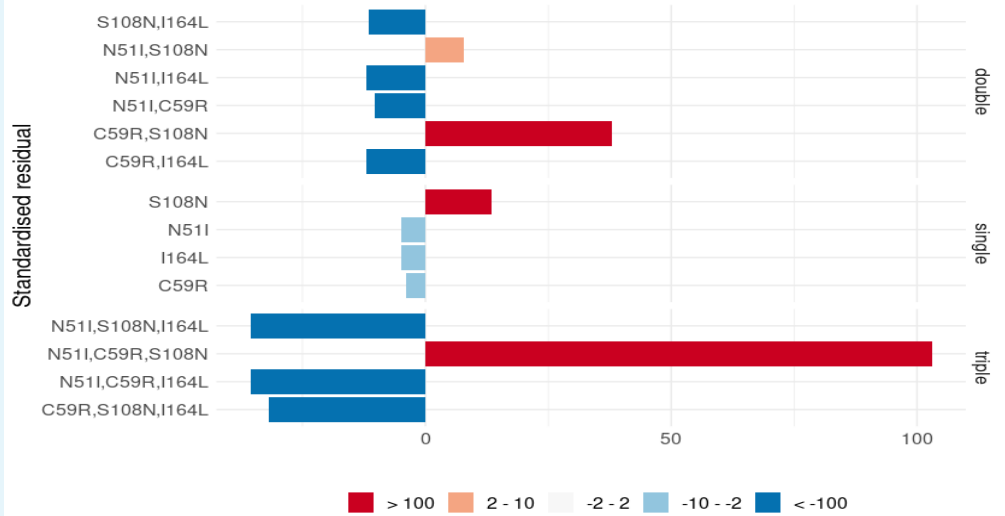

1138

1139

1140

**Appendix 2—figure 1.** The standardized residuals of the individual *Pf*DHFR mutations from the Chi-squared tests applied to single, double and triple mutants.

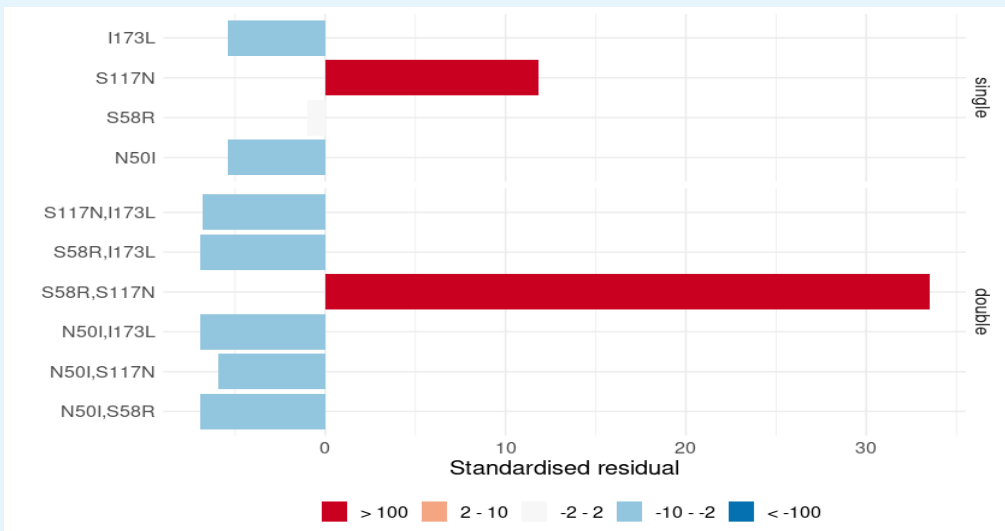

1142

1143

1145

**Appendix 2—figure 2.** The standardized residuals of the individual *Pv*DHFR mutations from the Chi-squared tests applied to single and double mutants.

## 1146 Appendix 3

### 1147 **Assessing the significance of the frequency distribution of mutations** 1148 **per region**

1149 The frequency of the mutations in the separate regions is often too small to reliably carry  
1150 out a Chi-squared test to determine if the regional distributions are significantly different  
1151 from the worldwide distribution. Therefore, for each region, a sample of size N (where N is  
1152 the size of the dataset from that region) was drawn with replacement from the worldwide  
1153 distribution, and this was repeated 50,000 per region to create a dataset of 50,000 bootstrap  
1154 samples per region. Comparing the frequency of mutations in the samples to the regional  
1155 data highlights those mutations whose frequency differs significantly from what would be  
1156 expected from the worldwide distribution.

#### 1157 ***PfDHFR***

1158 The distribution of mutations in Western Africa is similar to the worldwide distribution with  
1159 the exception of mutations N51I,C59R,S108N and N51I,C59R,S108N,I164L which are over-  
1160 represented and underrepresented in the region, respectively (Appendix 3 - Figure 1g). This  
1161 suggests the region is following the same pathway as the worldwide distribution but that the  
1162 evolution is at an earlier stage. Conversely, in Southeastern Asia (Appendix 3 - Figure  
1163 1f), N51I,C59R,S108N was underrepresented in the region, whilst N51I,C59R,S108N,I164L  
1164 was overrepresented, suggesting the region is following the same pathway as the world-  
1165 wide distribution but evolution to the quadruple mutation had occurred more often than  
1166 expected. Analysis of the distribution of mutations in Southern Asia (Appendix 3 - Figure  
1167 1e) suggests double mutation C59R,S108N is overrepresented in this region and the evolu-  
1168 tion in this region is more concentrated around the double mutant step in the pathway  
1169 than would be expected. Triple mutations N51I,C59R,S108N and C59R,S108N,I164L are  
1170 under- and overrepresented in this region, respectively, suggesting the alternative pathway  
1171 S108N/C59R/I164L/N51I is more prevalent in this region than expected.

1172 The distribution of mutations in Eastern Africa (Appendix 3 - Figure 1b) is similar to the  
1173 worldwide distribution with the exception of double mutations N51I,S108N and C59R,S108N  
1174 which are slightly over- and underrepresented in the region, respectively. Furthermore,  
1175 triple mutation N51I,C59R,S108N and the quadruple mutation are over- and underrepre-  
1176 sented, respectively. This suggests a true preference for the double mutant step S108N/N51I  
1177 over S108N/C59R in the pathway in this region compared to the worldwide distribution. Fur-  
1178 thermore, similar to Western Africa, the overrepresentation of the triple mutant step in the  
1179 most likely inferred pathway and the underrepresentation of the quadruple mutation sug-  
1180 gests this region is at an earlier stage in evolution compared to what would be expected  
1181 from the worldwide distribution.

1182 Similar to Eastern Africa, the distribution of mutations in Middle Africa (Appendix 3 - Fig-  
1183 ure 1a) showed significant differences in the frequency of double mutations N51I,S108N  
1184 and C59R,S108N which were over- and underrepresented, respectively. Triple mutation  
1185 N51I,C59R,S108N was overrepresented in this region and the quadruple mutation was un-  
1186 derrepresented. This suggests that like Eastern Africa, the evolutionary pathway in Middle  
1187 Africa shows a significant preference for the double mutant step S108N/N51I over S108N/C59R  
1188 and that the evolution is at an earlier stage in this region than would be expected from the  
1189 worldwide distribution i.e. evolution to the quadruple mutation has not occurred as fre-  
1190 quently as would be expected.

The distribution of mutations in South America is markedly different from the world-  
wide distribution, with single mutation S108N, double mutation N51I,S108N and triple mu-

1191  
1192  
1193  
1194  
1195  
1196  
1197  
1198  
1199  
1200  
1201  
1202

tation N51I,S108N,I164L all overrepresented, whilst triple mutation N51I,C59R,S108N and the quadruple mutation are underrepresented. This suggests this region has a significant preference for the mutations involved in the most likely inferred pathway in this region S108N/N51I/I164L and the evolution is following a significantly different trajectory than the worldwide distribution.

Finally, we analysed the distribution of mutations in Melanesia and found the double mutation C59R,S108N is significantly overrepresented, whilst N51I,C59R,S108N and the quadruple mutation, which were both absent from this region, were underrepresented. This suggests the evolution in this region is at a much earlier stage than would be expected from the worldwide data.

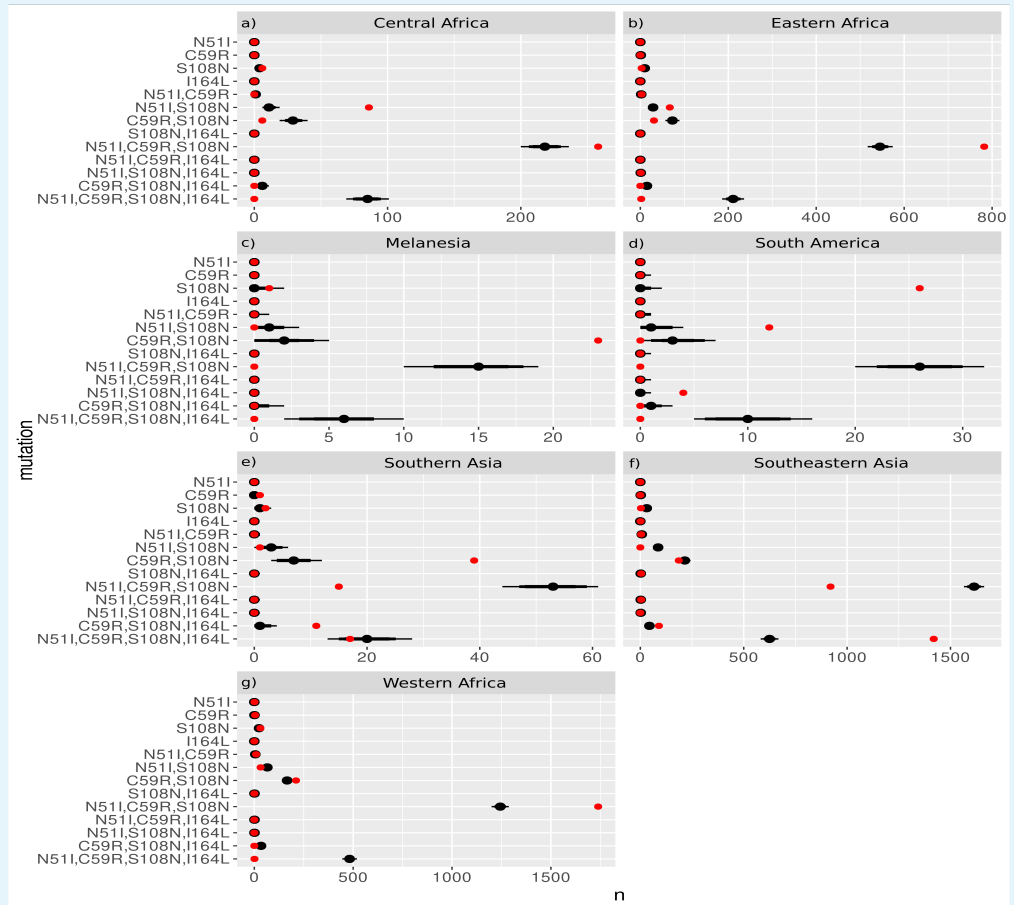

1203  
1204  
1205  
1206  
1207  
1208  
1209  
1210

**Appendix 3—figure 1.** The frequency distributions of the *PfDHFR* mutations from the 50,000 samples taken from the worldwide distribution with replacement for sample sizes equal to the regional datasets from a) Middle Africa, b) Eastern Africa, c) Melanesia, d) South America, e) Southern Asia, f) Southeastern Asia, and g) Western Africa. The red dots show the frequency of each mutation from the regional datasets and the black distributions show the 69%, 80% and 90% quantile intervals of frequency distributions from the samples.

1212  
1213  
1214  
1215  
1216

### ***PvDHFR***

The distribution of the four *PvDHFR* mutations in South America is similar to the worldwide distribution (Appendix 3 - Figure 2d) with all of the observed mutations occurring at frequencies within or just outside the expected range. This supports our inference that the evolution in South America is following the same most likely pathway as the worldwide data.

In Eastern Africa, S117N was found to be overrepresented and S58R,S117N was found



1217  
1218  
1219  
1220  
1221  
1222  
1223  
1224  
1225  
1226  
1227  
1228  
1229  
1230  
1231  
1232

to be underrepresented compared to the worldwide distribution (Appendix 3 - Figure 2a). This suggests evolution to the double mutation has not occurred as frequently in this region as would be expected from the worldwide distribution.

In Southern Asia, the distribution of mutations was as expected from the worldwide distribution, with the exception of N50I,S117N, which was overrepresented in this region (Appendix 3 - Figure 2e). This suggests the alternative pathway S117N/N50I inferred from the frequency data from this region is more prevalent than would be expected.

The frequency of the four *PvDHFR* mutations in Eastern Asia, Southeastern Asia and Melanesia is very low, therefore it is difficult to draw many conclusions about the frequency of mutations in these regions. From the distribution plots (Appendix 3 - Figures 2b, 2f and 2c for Eastern Asia, Southeastern Asia and Melanesia, respectively), the mutations appear to be found at similar frequencies to what would be expected from the worldwide distribution, however due to the low frequencies it is difficult to conclude that definitively. More data is required from these areas to draw conclusions regarding the distribution of their mutations and the evolutionary pathways they appear to be following.

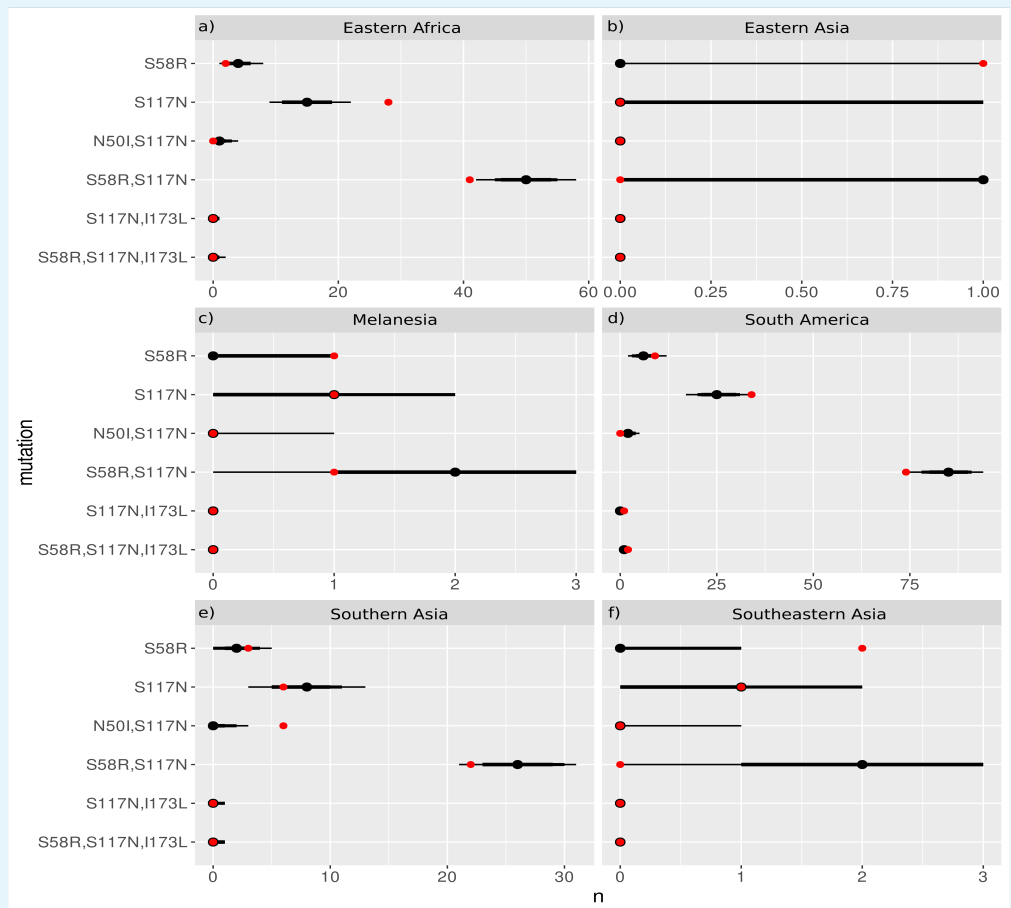

1233  
1234  
1235  
1236  
1237  
1238  
1239  
1240

**Appendix 3—figure 2.** The frequency distributions of the *PvDHFR* mutations from the 50,000 samples taken from the worldwide distribution with replacement for sample sizes equal to the regional datasets from a) Eastern Africa, b) Eastern Asia, c) Melanesia, d) South America, e) Southern Asia and f) Southeastern Asia. The distribution from Central America was not analysed because it did not contain any combinations of the four *PvDHFR* mutations being studied. The red dots show the frequency of each mutation from the regional datasets and the black distributions show the 69%, 80% and 90% quantile intervals of frequency distributions from the samples.
